# Supplementary material
Source: PubMed Central journal article supplement (PMC4714868)
Supplement: NIHMS312925-supplement-Supplemental.pdf [file NIHMS312925-supplement-Supplemental.pdf]

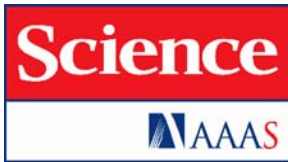

## Supporting Online Material for

### **Metabolic Syndrome and Altered Gut Microbiota in Mice Lacking Toll-Like Receptor 5**

Matam Vijay-Kumar, Jesse D. Aitken, Frederic A. Carvalho, Tyler C. Cullender,  
Simon Mwangi, Shanthi Srinivasan, Shanthi V. Sitaraman,  
Rob Knight, Ruth E. Ley, Andrew T. Gewirtz\*

\*To whom correspondence should be addressed. E-mail: [agewirt@emory.edu](mailto:agewirt@emory.edu)

Published 4 March 2010 on *Science Express*  
DOI: 10.1126/science.1179721

#### **This PDF file includes:**

Materials and Methods  
Figs. S1 to S19  
Tables S1 to S3  
References

## **MATERIALS AND METHODS**

**Mice:** TLR5-deficient mice were generated as previously described (1). Data in this paper were generated from WT littermates and T5KO mice that were back-crossed for 10 generations. T5KO mice were crossed with, respectively, mice lacking TLR2 and TLR4 (T2KO, T4KO) and RAG-1 (RAG1-KO) (purchased from Jackson Laboratories) to generate T2/T5DKO, T4/5DKO and T5/RAG1-DKO mice and WT littermates, RAG1-KO, T2KO, and T4KO. MyD88KO mice and corresponding WT controls were bred at Emory University. All animal experiments were approved by the Emory University ethical committee.

**Rederivation:** Male T5KO mice were bred with WT female C57BL/6J mice purchased from Jackson Laboratory (Bar Harbor, ME). The embryos were transferred to surrogate C57BL/6J mice and generated TLR5 heterozygotes. These mice were bred to obtain WT and T5KO mice with gut microbiota identical (or similar) to C57BL/6J mice from Jackson Laboratories.

**Body fat analysis:** The mice were imaged on a Biospec (Bruker) 3-T MRI system 9.4 Tesla using a custom-sized send-receive coil.

**Ex-Vivo organ culture:** One cm segments of proximal colons washed in HBSS containing penicillin and streptomycin or 100 mg of adipose tissue were cultured in 24-well culture plates in serum-free RPMI 1640 medium supplemented with penicillin and streptomycin, L-glutamine, and non essential amino acids. After 24-h, supernatant was collected and centrifuged at 13,000 g for 10 minutes at 4°C and stored at -20°C until analyzed.

**Stool output measurement:** Mice were placed in a clean cage individually and stools were collected for 1-h. Dry weights were taken after stool pellets were incubated over night at 65°C.

**Serum analysis:** Mice were given either regular laboratory chow (fat 4.5%, Lab Diets 5001) or high-fat diet (fat 34.9%, D12492, Research Diets Inc., New Brunswick, NJ). Mice were fasted for 5-h at which time blood was collected by retrobulbar intraorbital capillary plexus. Hemolysis-free serum was generated by centrifugation of blood using serum separator tubes (Becton Dickinson, Franklin Lakes, NJ). Serum cholesterol and triglycerides were quantified by colorimetric kits from BioVision (Mountain View, CA). Serum insulin and leptin were analyzed by ELISA kits purchased from Linco Research Inc (St. Charles, MO). Serum neuropeptide Y levels were quantified (on serum isolated from mice fed *ad libitum*) using a competitive ELISA kit from Ray Biotech (Atlanta, GA). Plasma GLP-1 was assayed by an ELISA kit from Alpco Immunoassays. Serum ghrelin was quantified by an ELISA kit from Millipore Corporation (Billerica, MA). Cytokines and lipocalin-2 was assayed by DuoSet ELISA kits (R&D Systems, Minneapolis, MN).

**Blood pressure analysis:** Blood pressure was measured on conscious animals via the tail-cuff method (MC4000; Hatteras Instruments, Cary, NC) following at least two weeks of daily training by a single operator. Pulse trace analysis of each reading was necessary to ascertain the stress level of the animal and determine the validity of the measurement.

**Assessment of islets:** Four 5 µm pancreas sections (separated by 200 µm) per mouse were used to assess islet number and size. Sections were H&E stained and assessed for size and number of islets

by a technician unaware of sample identity. Islet score reflects the average combined score per mouse. Each mouse received the combined score of 4 slides where for each slide each islet was assigned a score of 1-3 based on size.

**Immunofluorescence:** Pancreata were fixed in 10% formalin solution and embedded in paraffin using standard techniques. Paraffin sections were processed according to suggested protocols (Cell Signaling Technologies, Danvers, MA) and stained with guinea pig anti-insulin antibody (1:50) obtained from Zymed Laboratories (South San Francisco, CA) and probed with Alexa Fluor 488 conjugated to an anti-guinea pig antibody (1:500) (Invitrogen, Carlsbad, CA).

**Glucose tolerance test and estimation of insulin sensitivity:** Age-matched WT and T5KO mice were fasted for 5-h and baseline blood glucose levels measured with the aid of an Accu-Check Advantage blood glucose meter (Roche) using blood collected from the tail vein. Mice were injected intraperitoneally with 2 g glucose/kg body weight in sterile PBS and blood glucose levels measured 15, 30, 60, 90, and 120 min after injection. For insulin sensitivity test, 5-h fasted mice were injected intraperitoneally with 1.0 U insulin/kg body weight (Eli Lilly Co, Indianapolis, IN). Blood glucose was then measured 15, 30, 60, 90, and 120 min after injection.

**Assessment of insulin secretion:** For *in vivo* insulin secretion, 5-h fasted mice were injected intraperitoneally with 3 g glucose/kg body weight and serum insulin measured 0 and 2.5 min post-injection via ELISA.

**Caloric restriction:** Four week old WT and T5KO mice were given the amount of food every 2 days that a separate group of age and gender matched WT mice had eaten during the previous 2 days for a period of 12 weeks. Throughout the experiment, mice were monitored for body weight.

**Antibiotic treatment:** Four week old WT and T5KO mice were placed on broad spectrum antibiotics ampicillin (1.0g/L) and neomycin (0.5g/L) in drinking water for 12 weeks. As ampicillin and neomycin are poorly absorbed, such treatment primarily affects only intestinal microbiota without direct systemic effects (2). During this period mice were monitored for food intake, body weights, gross cecal appearance, and cecal microbiota quantification.

**Tissue myeloperoxidase (MPO) assay:** Tissue MPO was measured as described in (1)

**Bomb calorimetry:** Bomb calorimetry was performed on fecal samples collected from 13 mice (7 WT, 6 T5KO). Fecal samples were collected and frozen at -80°C until processing, then oven dried at 58°C for 48 hours. Gross energy content was measured using an isoperibol bomb calorimeter (Model C 2000, from IKA Works, Inc.). The calorimeter energy equivalent factor was determined using benzoic acid standards.

**Short-chain fatty acid analysis:** Short-chain fatty acids (SCFAs) were measured from 13 cecal samples (7 WT, 6 T5KO). SCFA levels were quantified according to previously published protocols (3). Briefly, approximately 50 mg of deproteinized cecal contents were suspended in acidified water spiked with isotope-labeled internal SCFA standards. Samples were mixed thoroughly, centrifuged, and supernatant was removed for quadruple extraction with diethyl ether. Derivatization of SCFAs was performed in duplicate with N-tert-butyldimethylsilyl-N-methyltrifluoroacetamide (MTBSTFA) and the resulting TBDMS derivatives were analyzed by GC-MS.

**Cecal microbiota analysis by 16S rRNA sequencing:** To avoid the confounding effects of co-housing on the diversity of cecal bacteria (4, 5), we selected mice from multiple litters that were housed separately. Bulk DNA was extracted from frozen extruded cecal contents using a modified phenol-chloroform extraction technique with mechanical disruption (bead-beating) as previously described (4). Briefly, an aliquot (~100mg) of each homogenized sample was, while frozen, suspended in a solution containing 500 µl of DNA extraction buffer [200 mM Tris (pH 8.0), 200 mM NaCl, 20 mM EDTA], 210 µl of 20% SDS, 500 µl of a mixture of phenol:chloroform:isoamyl alcohol (25:24:1), and 500 µl of a slurry of 0.1-mm-diameter zirconia/silica beads (BioSpec Products, Bartlesville, OK). Microbial cells were then lysed by mechanical disruption with a bead beater (BioSpec Products) set on high for 2 min (23°C), followed by extraction with phenol:chloroform:isoamyl alcohol, and precipitation with isopropanol. DNA was quantified using the Quant-iT PicoGreen dsDNA Assay Kit (Invitrogen) and a plate reader. For each sample, 16S rRNA genes were amplified using a composite forward primer and a reverse primer containing a unique 12-base barcode used to tag each PCR product (6), as previously described (7). Thus, for each sample, we amplified the 16S rRNA gene using the composite forward primer 5'-*GCCTTGCCAGCCCGCTCAGTC-AGAGTTTGATCCTGGCTCAG*-3': the italicized sequence is 454 Life Sciences® primer B, and the bold sequence is the broadly conserved bacterial primer 27F. The reverse primer used was 5'-*GCCTCCCTCGCGCCATCAGNNNNNNNNNNNCA-TGCTGCCTCCCGTAGGAGT*-3': the italicized sequence is 454 Life Sciences' primer A, and the bold sequence is the broad-range bacterial primer 338R. *NNNNNNNN* designates the unique twelve-base barcode used to tag each PCR product (6), with 'CA' inserted as a linker between the barcode and rRNA primer. Three independent PCRs were performed for each

sample along with a no-template control. For each sample, the three replicate PCR products were combined and purified with Ampure magnetic purification beads (Agencourt Bioscience Corp. Beverly, MA), and products quantified described above. A master DNA pool was generated from the purified products in equimolar ratios to a final concentration of 21.5 ng/μl. The pooled products were sequenced using a Roche 454 FLX pyrosequencer at the EnGenCore genome sequencer center at the University of South Carolina. After removal of low-quality sequences and trimming of primer sequences, sequences were assigned to a sample based on the barcodes (7). **Phylotype assignment** - at 97% pair-wise sequence identity was generated from the sequence pool as previously described (8). Sequence identity was calculated using megablast (9). **Taxonomy assignment** - Taxonomy was assigned using the best megablast (10) hit against Greengenes (11) (E-value cutoff of  $1 \times 10^{-12}$ ; minimum %ID of 88% of the length of the shorter sequence; word size 38) and the Hugenholtz taxonomy ([http://greengenes.lbl.gov/Download/Sequence\\_Data/Greengenes\\_format/greengenes16SrRNAgenes.txt.gz](http://greengenes.lbl.gov/Download/Sequence_Data/Greengenes_format/greengenes16SrRNAgenes.txt.gz), downloaded Sept 18 2008 and flagged chimeras omitted). To determine the best BLAST hit to mouse-only or human-only derived sequences, custom databases including matches to human or mouse-derived sequences only were constructed from the Greengenes database. **Sample clustering using UniFrac** - One sequence representing each phylotype was aligned using NAST (11) and a phylogenetic tree built using FastTree (12) with Kimura correction. Samples were clustered using the UniFrac metric (13): UniFrac distances between samples are based on the fraction of branch length that is unique to one sample or another in a shared phylogenetic tree composed of sequences from both samples. Principal coordinates analysis was applied to the unweighted UniFrac distance matrix as previously described (8, 14). **Phylogenetic reconstructions** – sequences representative of enriched or depleted phylotypes

were aligned using NAST and the nearest cultured and uncultured neighbors were also retrieved from the Greengenes database using the Simrank online tool ([http://greengenes.lbl.gov/cgi-bin/nph-NAST\\_align.cgi](http://greengenes.lbl.gov/cgi-bin/nph-NAST_align.cgi)). A maximum likelihood analysis was conducted with RAxML, using four sequences from candidate phylum WS3 as an outgroup, and 100 bootstrap replicates were performed using the online server <http://phylobench.vital-it.ch/raxml-bb/> (15).

**Quantification of cecal microbiota by qPCR:** Quantitative PCR was performed on genomic DNA extracted from the cecal contents of WT or T5KO mice (n=10) as described above. qPCR was performed and analyzed using SYBR® Green I dye chemistry and 7300 Real-Time PCR Systems and Software (Applied Biosystems). Each 50 µl reaction contained 10-30 ng of cecal DNA, 25 µl of 2x SYBR® Green PCR Master Mix (Applied Biosystems, CA), 40 nM of the bacteria-specific primer 8F (5'-AGAGTTTGATCCTGGCTCAG-3'), and 40 nM of the universal primer 338R (5'-CTGCTGCCTCCCGTAGGAGT-3'), (Invitrogen, Carlsbad, CA). Standard curves were prepared from serial dilution of *Escherichia coli* 25 genomic DNA extracted in the same manner as above and all samples were run in duplicate. Primers were optimized to yield the minimum  $C_T$  and maximum  $\Delta R_n$ . Cycling conditions were 50°C for 2 min, followed by 95°C for 10 min, followed by 40 cycles of 95°C for 30 s and 56°C for 1 min, with a final melting curve period of 95°C for 15 s, 60°C for 30 s, and another 15 s at 95°C.

**Microbiota transplantation:** Cecal contents were pooled from 3 T5KO mice and age- and gender-matched WT littermates. Cecal extracts were suspended in PBS (2.5 ml per cecum) and were administered (0.1 ml per mouse) immediately to sterilely-packed 4 week old Swiss-Webster



male WT germ free mice that were purchased from Taconic (Hudson, NY). Transplanted mice were maintained in sterile cages and monitored for body weight and food intake.

**Statistical analysis:** In point plots, horizontal lines indicate means. Data in bar plots are means + S.E.M. Statistical significance was assessed by Student's two-tailed t test, with p-values of  $<0.05$  considered significant. For the comparisons of mean phylotype abundances in WT and T5KO mice, significance levels were adjusted for multiple comparisons using Bonferroni's correction (Tables S2, S3).

## References (for methods)

1. M. Vijay-Kumar *et al.*, *J Clin Invest* **117**, 3909 (Dec, 2007).
2. L. Ferrier *et al.*, *Am J Pathol* **168**, 1148 (Apr, 2006).
3. P. J. Turnbaugh *et al.*, *Nature* **444**, 1027 (Dec 21, 2006).
4. R. E. Ley *et al.*, *Proc Natl Acad Sci U S A* **102**, 11070 (Aug 2, 2005).
5. L. Wen *et al.*, *Nature* **455**, 1109 (Oct 23, 2008).
6. M. Hamady, J. J. Walker, J. K. Harris, N. J. Gold, R. Knight, *Nat Methods* **5**, 235 (Mar, 2008).
7. N. Fierer, M. Hamady, C. L. Lauber, R. Knight, *Proc Natl Acad Sci U S A* **105**, 17994 (Nov 18, 2008).
8. P. J. Turnbaugh *et al.*, *Nature* **457**, 480 (Jan 22, 2009).
9. S. McGinnis, T. L. Madden, *Nucleic Acids Res* **32**, W20 (Jul 1, 2004).
10. S. F. Altschul, W. Gish, W. Miller, E. W. Myers, D. J. Lipman, *J Mol Biol* **215**, 403 (Oct 5, 1990).
11. T. Z. DeSantis, Jr. *et al.*, *Nucleic Acids Res* **34**, W394 (Jul 1, 2006).
12. M. N. Price, P. S. Dehal, A. P. Arkin, *Mol Biol Evol* **26**, 1641 (Jul, 2009).
13. C. Lozupone, M. Hamady, R. Knight, *BMC Bioinformatics* **7**, 371 (2006).
14. C. Lozupone, R. Knight, *Appl Environ Microbiol* **71**, 8228 (Dec, 2005).
15. A. Stamatakis, P. Hoover, J. Rougemont, *Syst Biol* **57**, 758 (Oct, 2008).

## Figure Legends for Supplemental Figures.

**Fig. S1. Rederived T5KO mice exhibit mild colitis.** T5KO mice and WT littermates were rederived via embryo transplantation using mice from Jackson Laboratories. Mice were analyzed at age 12 weeks. (A) Mass of spleen. (B) Colon mass. (C) Cecal MPO. (D) Colonic myeloperoxidase (MPO). (E) Serum lipocalin-2. Results are from a single group of mice (n=7-21) and representative of 3 independent analyses. (\* indicates  $p < 0.05$ ).

**Fig. S2. Elevated proinflammatory cytokine secretion by T5KO adipose tissue.** Adipose tissue (100 mg) from 20 week old WT and T5KO mice was cultured for 24-h and cytokines in the supernatants were assayed. (A) IFN $\gamma$ . (B) IL-1 $\beta$ . Results are from a single group of mice experiment (n=6). (\* indicates  $p < 0.05$ ).

**Fig. S3. T5KO mice exhibit dysglycemia and enlarged islets.** (A) Blood glucose assayed from mice fed *ad libitum*. (B) H & E stained pancreatic islets. (C) Sections of pancreas were immunostained for insulin. Results are from a single group of mice (n=6) and representative of 2 independent analyses.

**Fig. S4. High fat diet aggravates metabolic syndrome in T5KO mice.** Four week old WT and T5KO mice were given a high-fat diet for 8 weeks. (A) Body mass. (B) Fat pad mass. (C) Serum triglycerides. (D) Serum cholesterol. (E) Serum leptin. (F) Serum

insulin. Results are from a single experiment (n=5-6) and representative of 2 independent experiments. (\* indicates  $p < 0.05$ ).

**Fig. S5. Stool output in WT and T5KO mice.** Individual mice fed *ad libitum* were placed in cages for 1 h. Stools were collected, weighed and re-weighed following overnight drying at 65°C. (A) Wet stool mass. (B) Dry stool mass. Results are from a single experiment (n=6) and representative of 5 independent experiments. (\* indicates  $p < 0.05$ ).

**Fig. S6. Fecal Energy and short-chain fatty acid content in WT and T5KO mice.** Fecal samples were isolated from 8 week-old WT and T5KO mice (n= 6-7) and the following measured: (A) Energy content measured by bomb calorimetry, expressed as mean Kcal per gram dry mass. (B) Levels of the short-chain fatty acids acetate, propionate, and butyrate expressed as mmoles per gram dry mass. The differences between WT and T5KO mice were not statistically significant.

**Fig. S7. T5KO mice hyperphagia is independent of appetite regulating peptide hormones.** Sera was isolated from 5h-fasted 20 week old mice (n=15-18) were analyzed for: (A) Ghrelin. (B) Neuropeptide Y (NPY). (C) Leptin. (D) Plasma GLP-1. (\* indicates  $p < 0.05$ ).

**Fig. S8. Calorie restriction reduces serum indicators of metabolic syndrome in T5KO mice.** Sera from WT and T5KO mice that had been subjected to food restriction for 12 weeks (from Fig 4) were analyzed for the following: (A) Cholesterol. (B) Leptin. and (C) Insulin.

**Fig. S9. T5KO metabolic syndrome does not require TLR2.** Twenty week old mice deficient in TLR2 (T2KO) or TLR2 and TLR5 (T2/5-DKO) mice were analyzed for the following parameters: (A) Body mass. (B) Food intake. (C) 15-h fasting blood glucose. Results are from an individual group of mice (n=8-11). (\* indicates  $p < 0.05$ ).

**Fig. S10. T5KO metabolic syndrome is independent of TLR4.** Twenty week old mice deficient in TLR4 (T4KO) or TLR4 and TLR5 (T4/5-DKO), and age-matched WT mice were analyzed for the following parameters: (A) Food intake. (B) Body mass. (C) 15-h fasting blood glucose. (D) Serum insulin. (E) Insulin sensitivity. (F) Photograph showing abdominal adiposity. (G) Fat pad mass. Results are from an individual group of mice (n=6-12) and representative of 2 groups of mice. (\* indicates  $p < 0.05$ ).

**Fig. S11. MyD88 deficient mice do not exhibit metabolic syndrome.** Twenty week old WT or MyD88-deficient (MyD88KO) mice were analyzed for the following parameters: (A) Body mass. (B) Food intake. (C) 15-h fasting blood glucose. (D) Fat pad mass. Results are from an individual group of mice (n=8) and representative of 2 groups of mice. (\* indicates  $p < 0.05$ ).

**Fig. S12. T5KO dysglycemia is independent of adaptive immunity.** Mice deficient in RAG1 (RAG1-KO) or RAG1 and TLR5 (RAG1/T5-DKO) at indicated age were fasted for 15-h and blood glucose levels were measured. Results are from sequential measurements of a single group of mice (n=10) and representative of measurements performed on 2 distinct groups of mice. (\* indicates  $p < 0.05$ ).

**Fig. S13. Broad spectrum antibiotics reduce microbiota density.** Immediately after weaning WT and T5KO mice (n=4-10) were placed on drinking water containing ampicillin and neomycin. Twelve weeks later, mice were assayed for: (A) Gross cecal appearance. (B) Microbiota quantification by qRT-PCR of 16S rRNA. (\* indicates  $p < 0.05$ ).

**Fig. S14. Broad spectrum antibiotics prevents T5KO metabolic syndrome.** Immediately after weaning WT and T5KO mice were placed on drinking water containing ampicillin and neomycin. Twelve weeks later, mice were assayed for: (A) Fat pad mass. (B) Food intake. (C) Serum triglycerides. (D) 15-h fasting blood glucose. Results are from an individual group of mice (n=6) and representative of 2 independent experiments (other shown in fig 4). (\* indicates  $p < 0.05$ ).

**Fig. S15. T5KO mice exhibit taxonomical alterations in gut microbiota.** Untreated WT and T5KO mouse cecal contents were analyzed via 16S rRNA analysis. Mouse cecal bacterial communities were clustered using principal coordinates analysis (PCoA) of the UniFrac unweighted distance matrix. PC1 and PC2 are plotted. Each symbol

corresponds to a mouse: filled circles are T5KO and open squares are WT. The percentage of the variation explained by the plotted principal coordinates is indicated in the axis labels. Results are from an analysis of 4-5 mice per group. (\* indicates mean PC1 values for WT and T5KO are significantly different).

**Fig. S16. Altered *Firmicutes* in T5KO mice.** Phylogenetic relationships of the significantly enriched or depleted phylotypes in WT (blue labels, sequence name prefix="WT\_UP") and T5KO (red labels, sequence name prefix="KO\_UP"). The closest relatives that are uncultured (black labels) and cultured (green labels) as determined by searching against the Greengenes database, are included. The best tree from maximum likelihood analysis with 100 bootstrap replicates is shown, filled circles on nodes represent  $\geq 70\%$  support, see text for details. Scale bar shows nucleotide substitutions per site. This tree includes all phylotypes except those of the phylum *Bacteroidetes*.

**Fig. S17. Altered *Bacteroidetes* in T5KO mice.** Phylogenetic tree of the *Bacteroidetes*, see legend for Fig. S16.

**Fig. S18. T5KO mice gut microbiota is necessary and sufficient to transfer metabolic syndrome to WT germ-free mice.** 4-week old WT germ-free mice were intragastrically administered cecal contents from WT or T5KO mice (n=5-6), monitored for 7 weeks, and analyzed for the following: (A) Serum insulin. (B) 15-h fasting blood glucose. (C) Photograph showing abdominal adiposity. (D) Colon mass. (\* indicates  $p < 0.05$ ).

**Fig. S19. Proposed mechanism of T5KO metabolic syndrome**

**Table S1 and S2. Phylotypes depleted (S1) and enriched (S2) in T5KO versus WT**

**mice.** Numbers are means of the percent abundance of a given phylotype in each individual mouse for each mouse type (T5KO, n=5, or WT, n=4) with standard errors.

The p-values were calculated using a Student's t-test (2-tailed, equal variance). Only data for phylotype mean abundance differences with p-values < 0.05 are shown.

“Phylotype ID” refers to the label of each phylotype in the phylogenetic trees (Figures S17, S18). Consensus lineages are derived from the taxonomy consensus of 80% of sequences in a phylotype. The phylotypes highlighted blue have significant p-values when the Bonferroni correction is applied to correct for multiple comparisons. Consensus lineages are derived from the taxonomy consensus of 80% of sequences in a phylotype.

**Table S3. Closest matches between phylotypes obtained in this study and phylotypes obtained from studies of human gut microbiotas (upper table) and mouse gut**

**microbiotas (lower table).** Table lists closest bacterial species, based on BLAST analysis, to the phylotypes listed in Table S1 and S2.



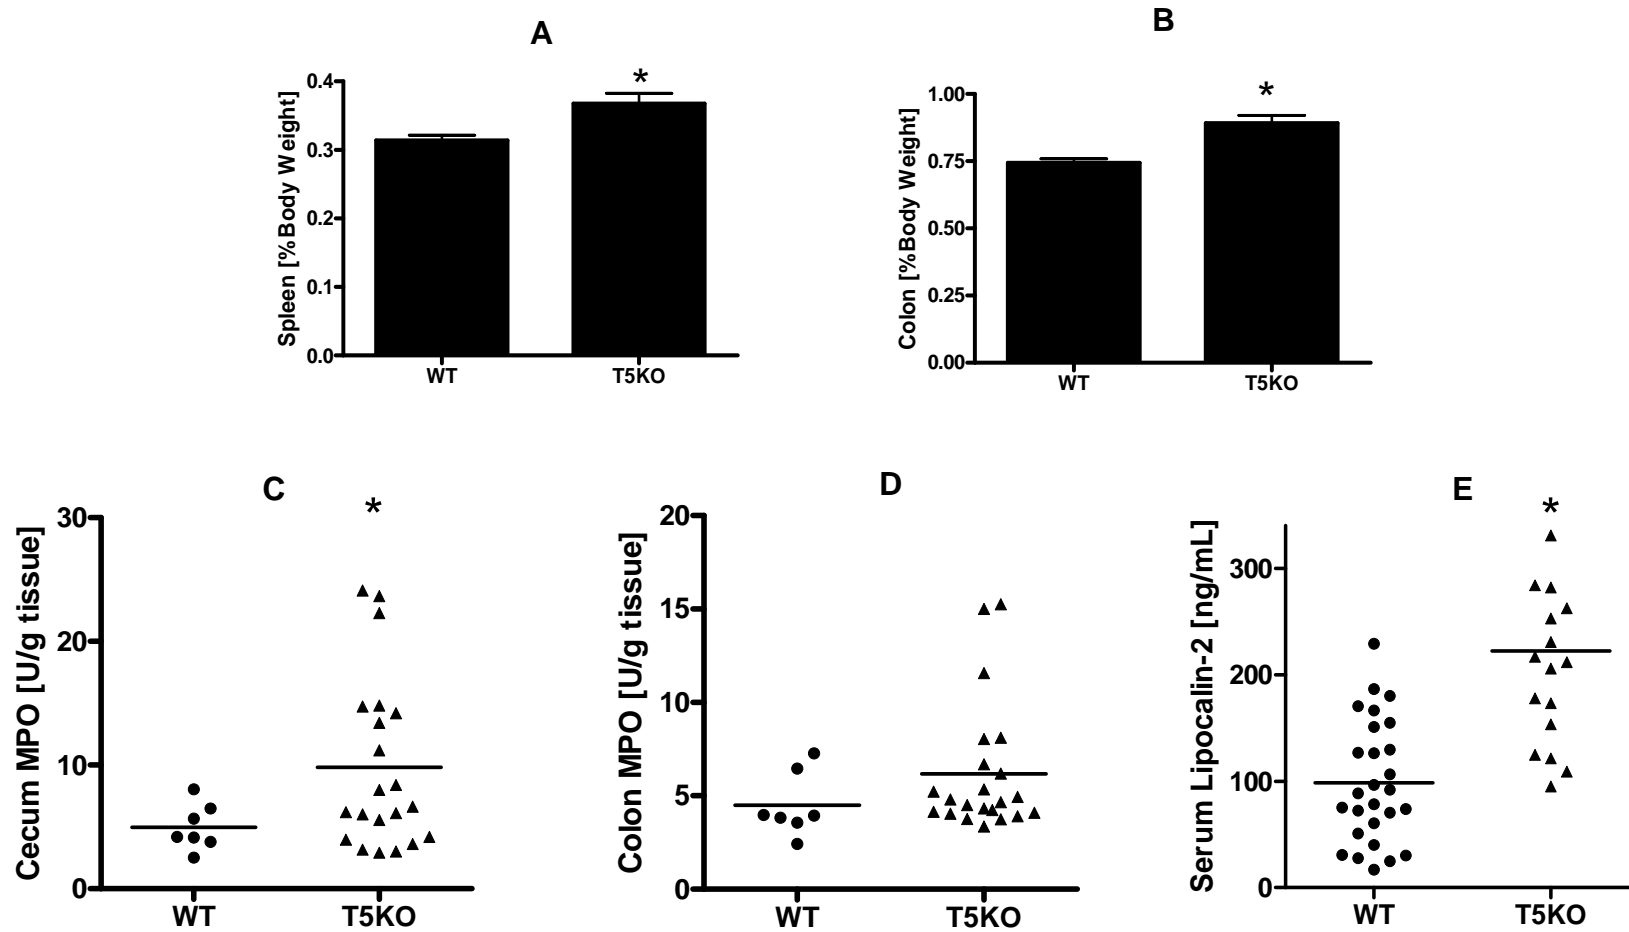

Fig. S1.

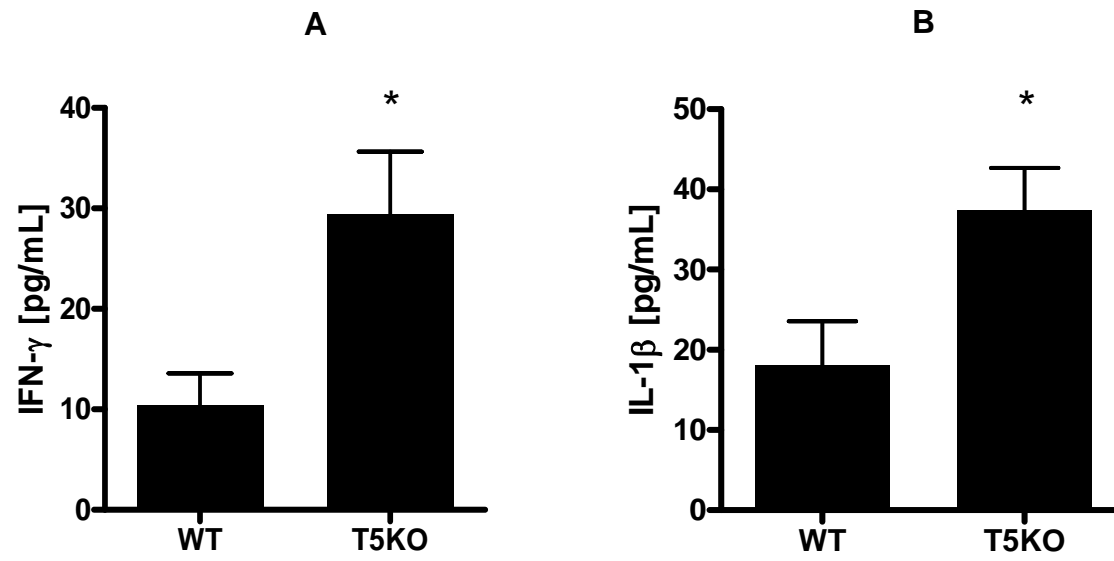

Fig. S2.

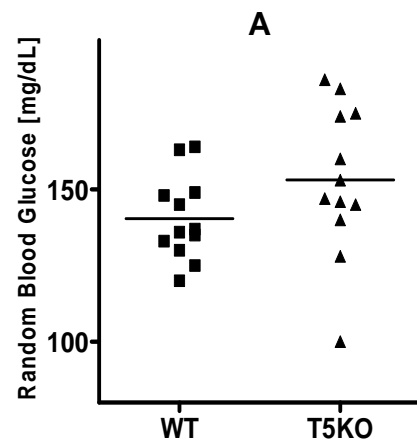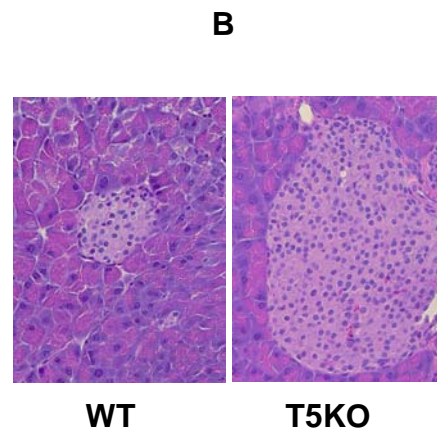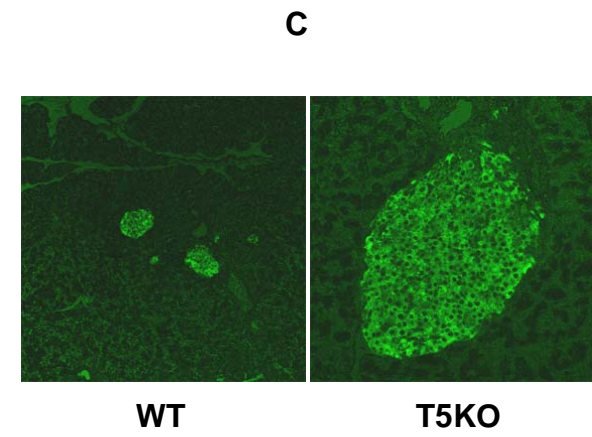

Fig. S3.

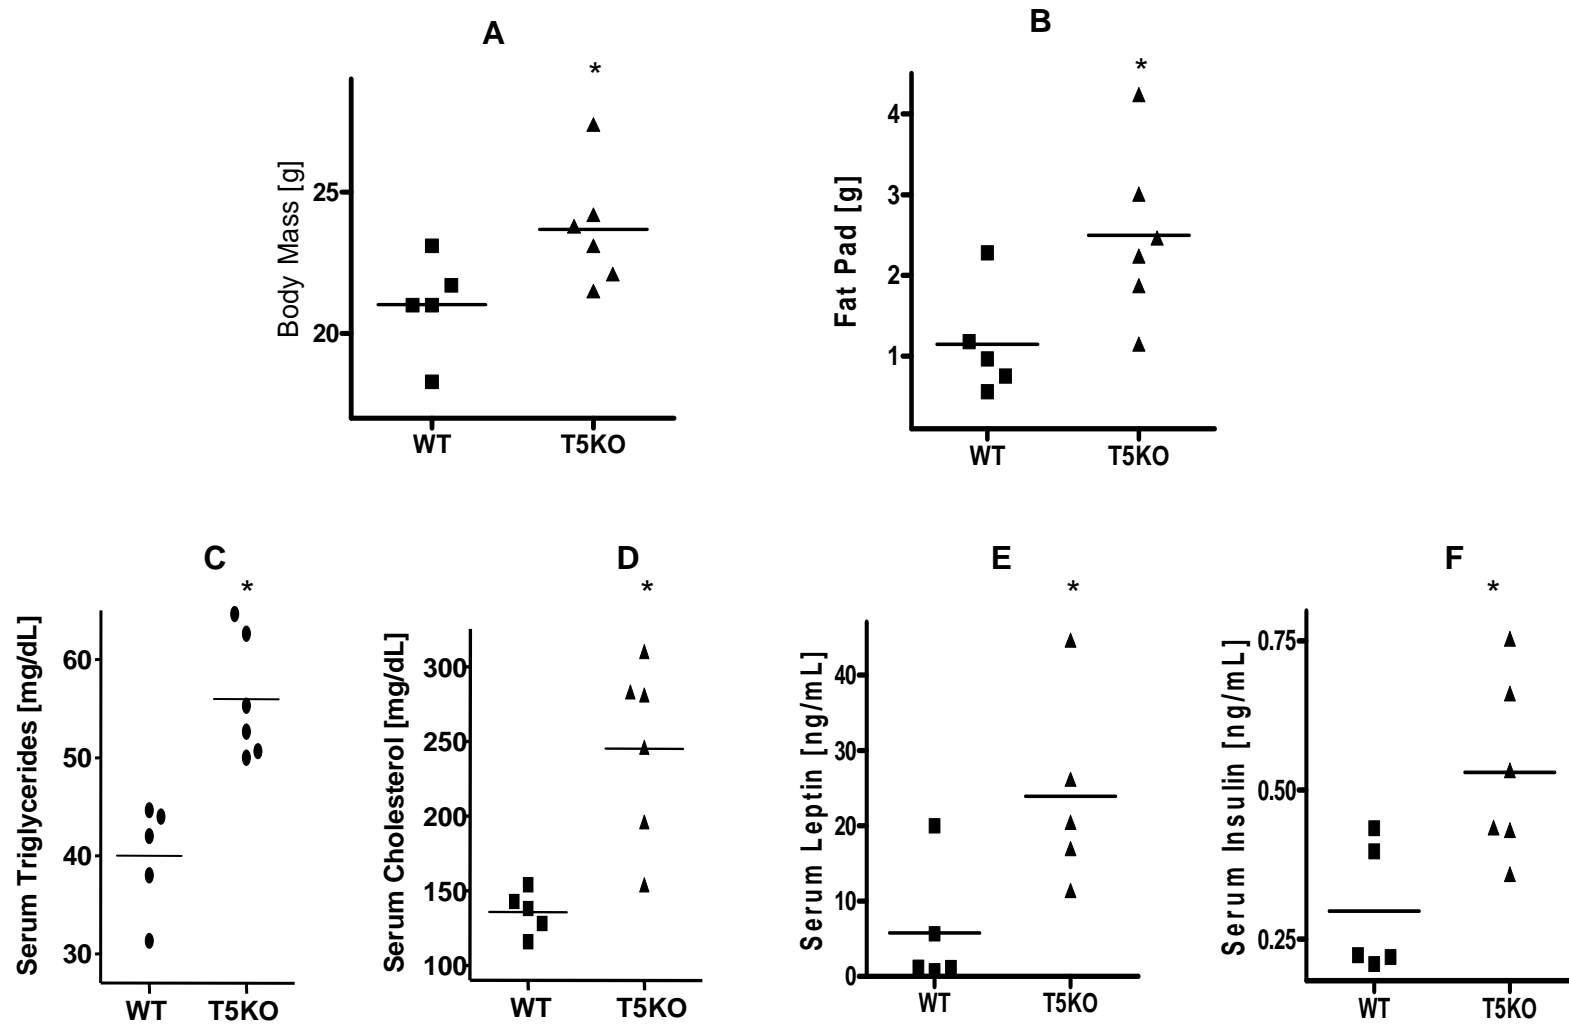

Fig. S4.

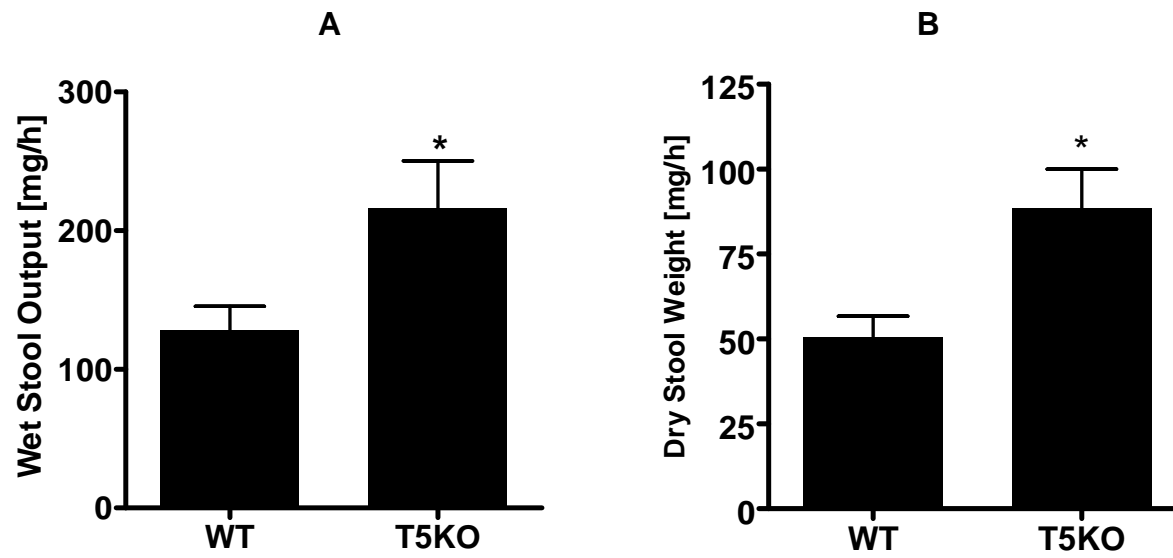

Fig. S5.

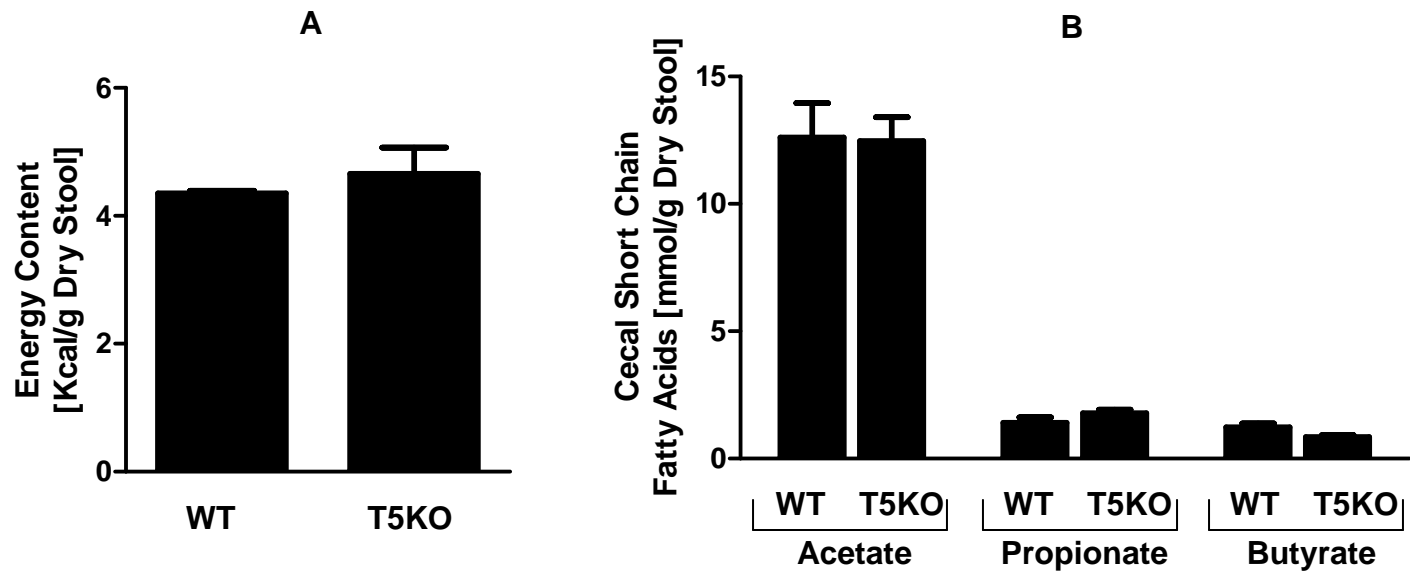

Fig. S6.

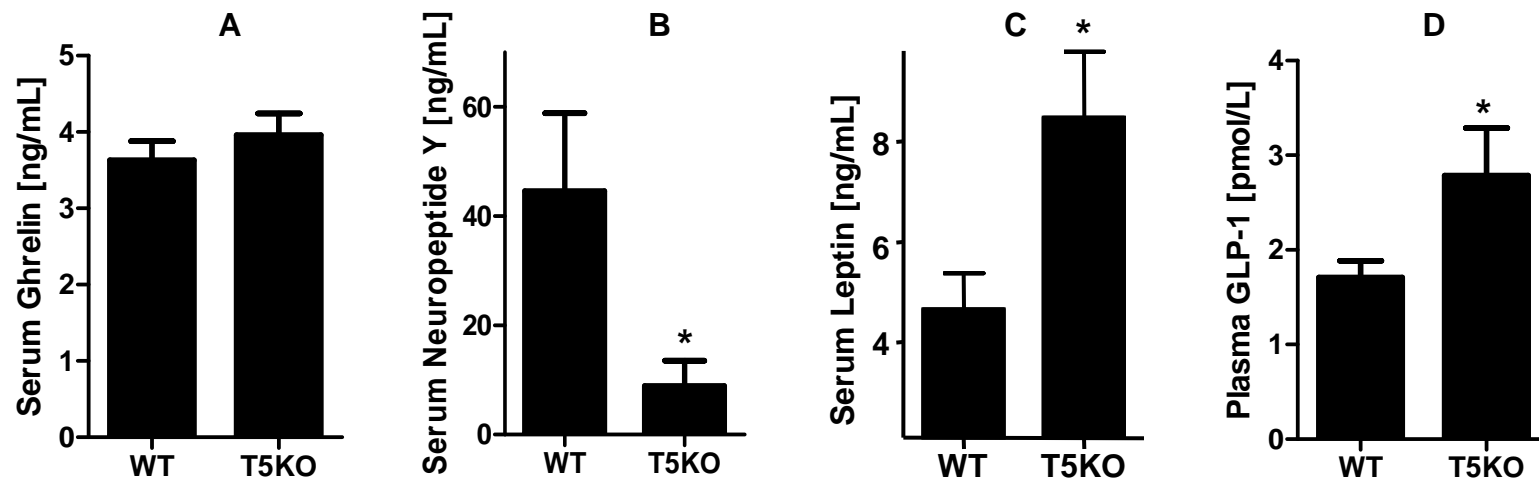

Fig. S7.

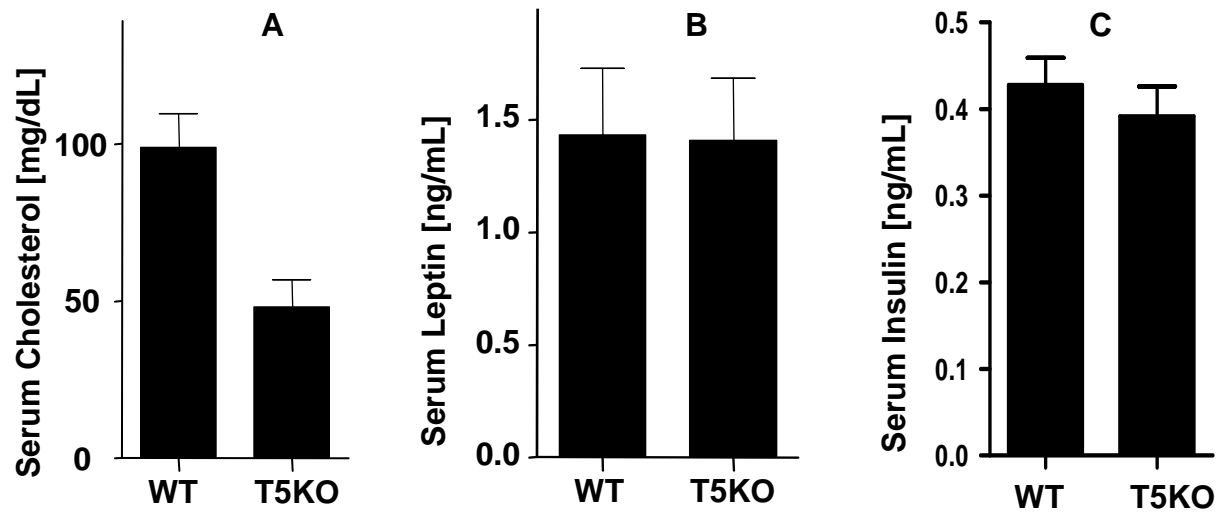

Fig. S8.



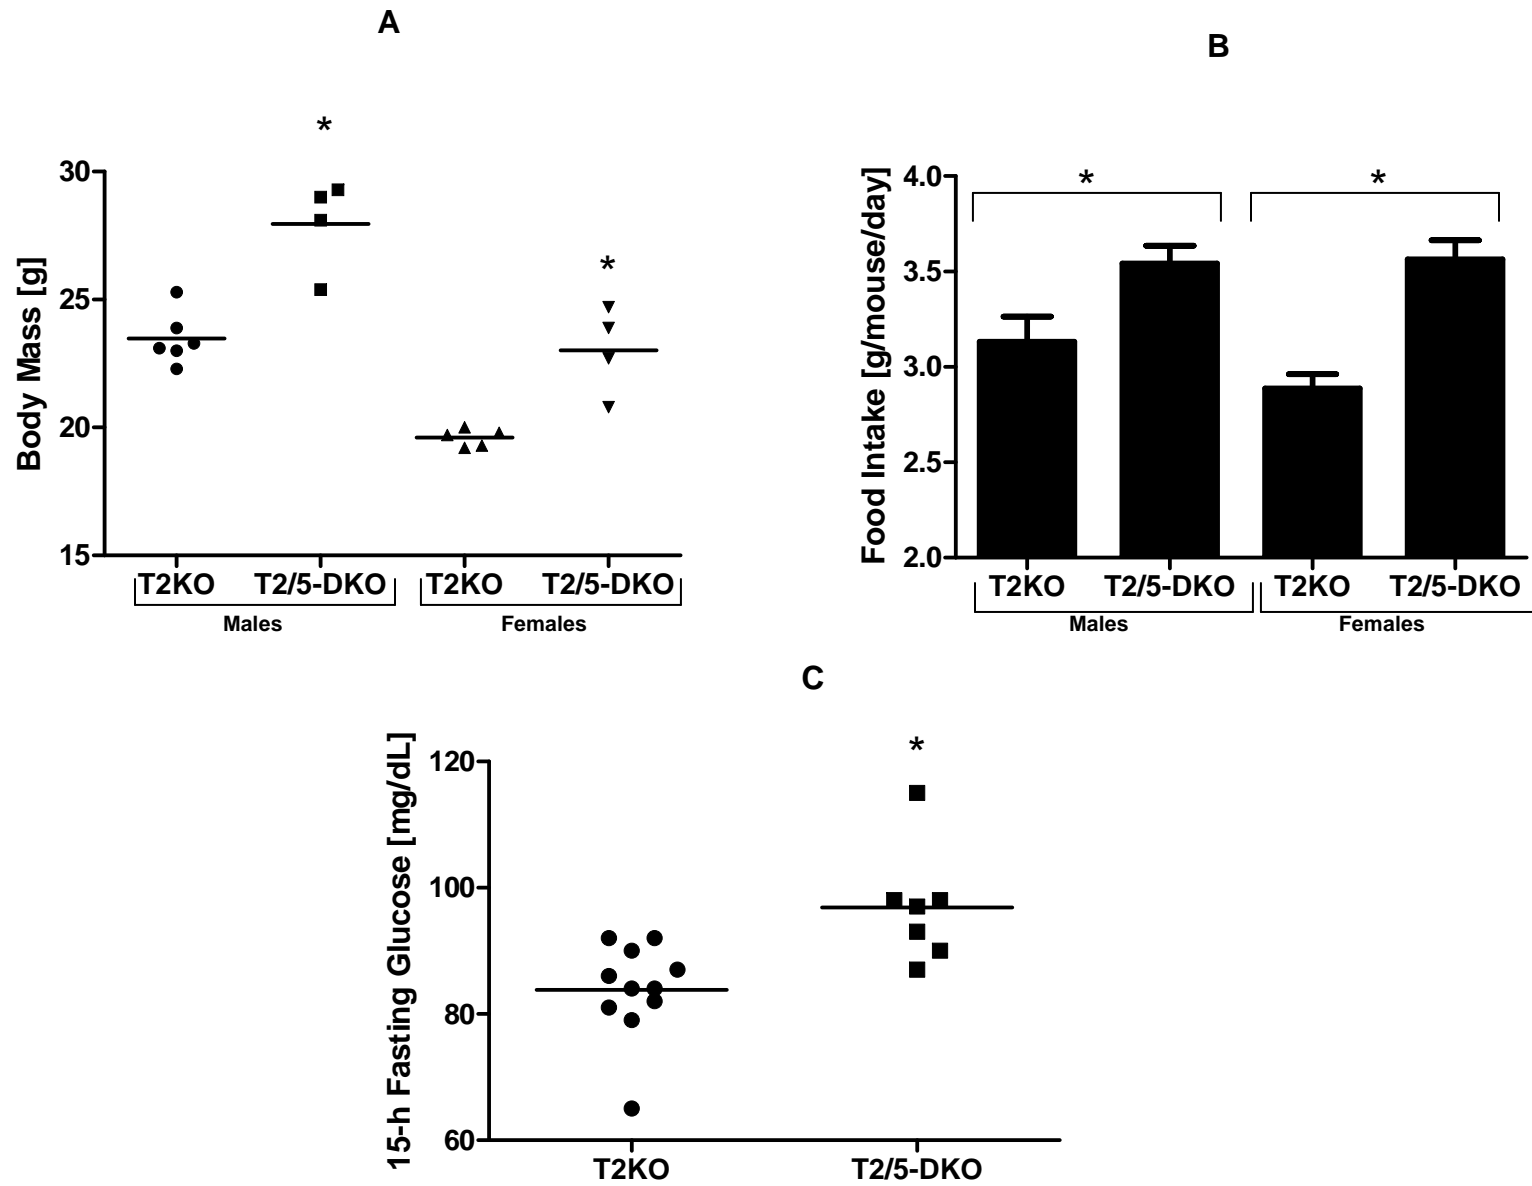

Fig. S9.

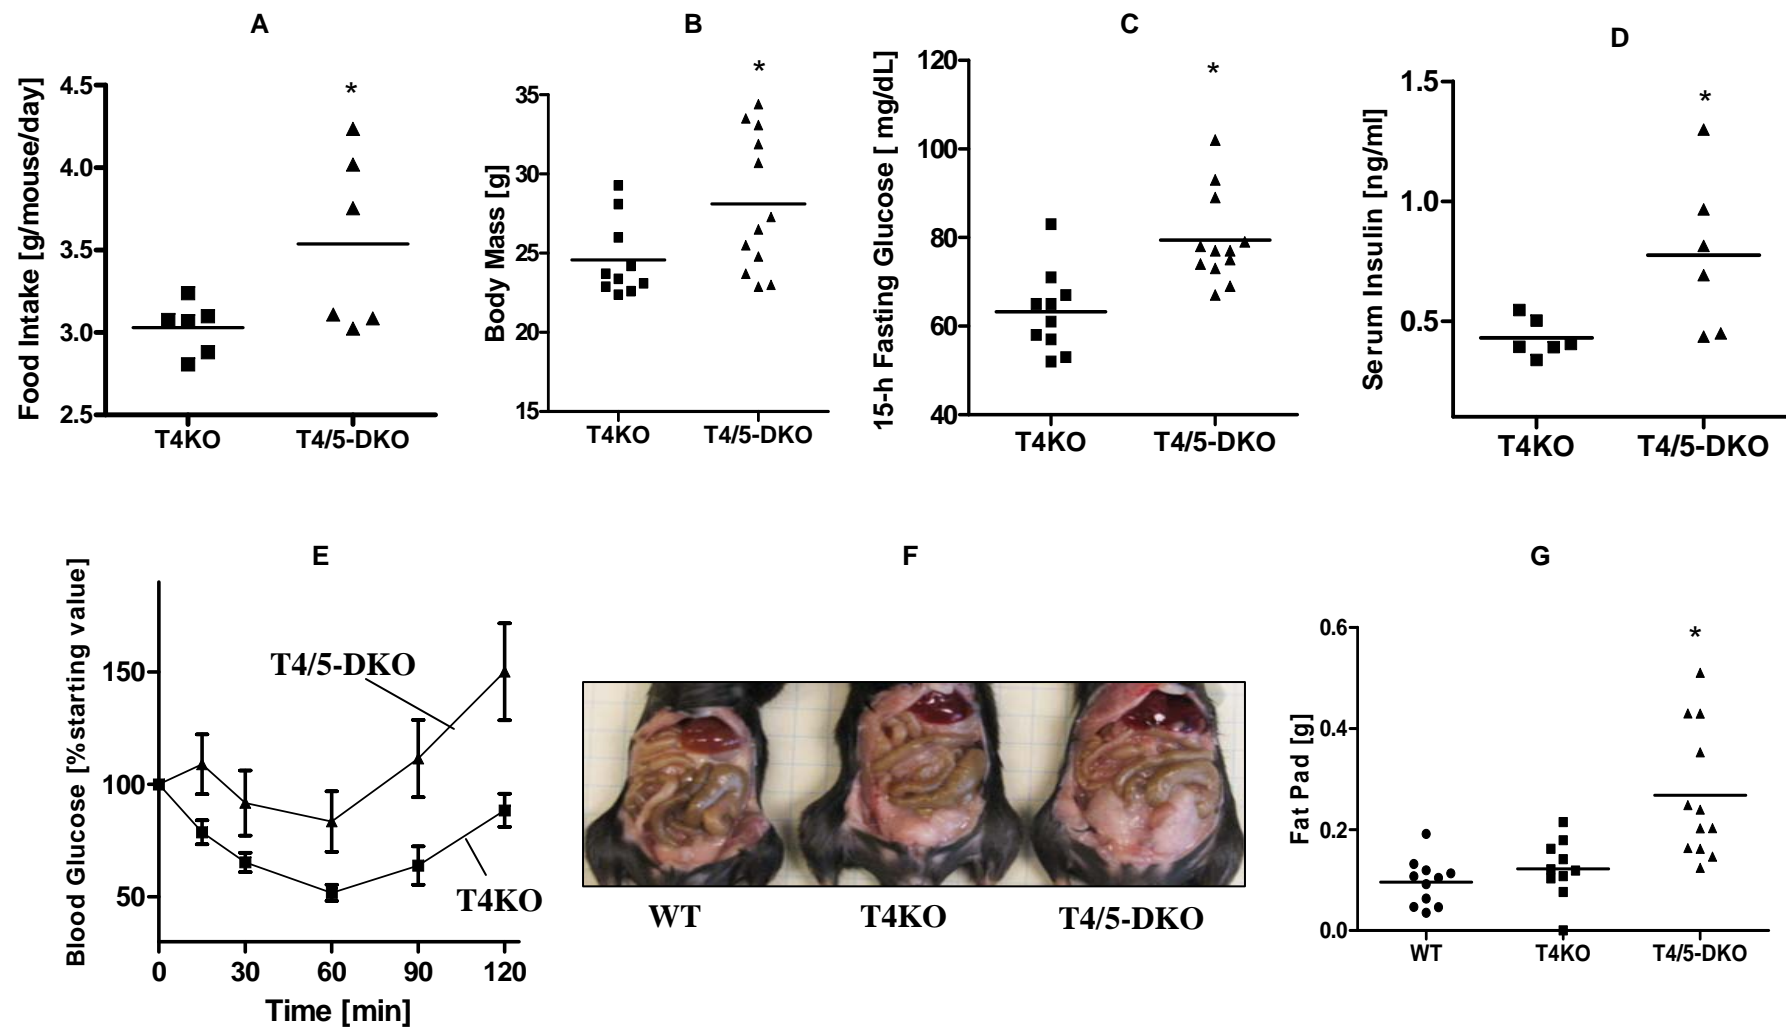

Fig.S10.

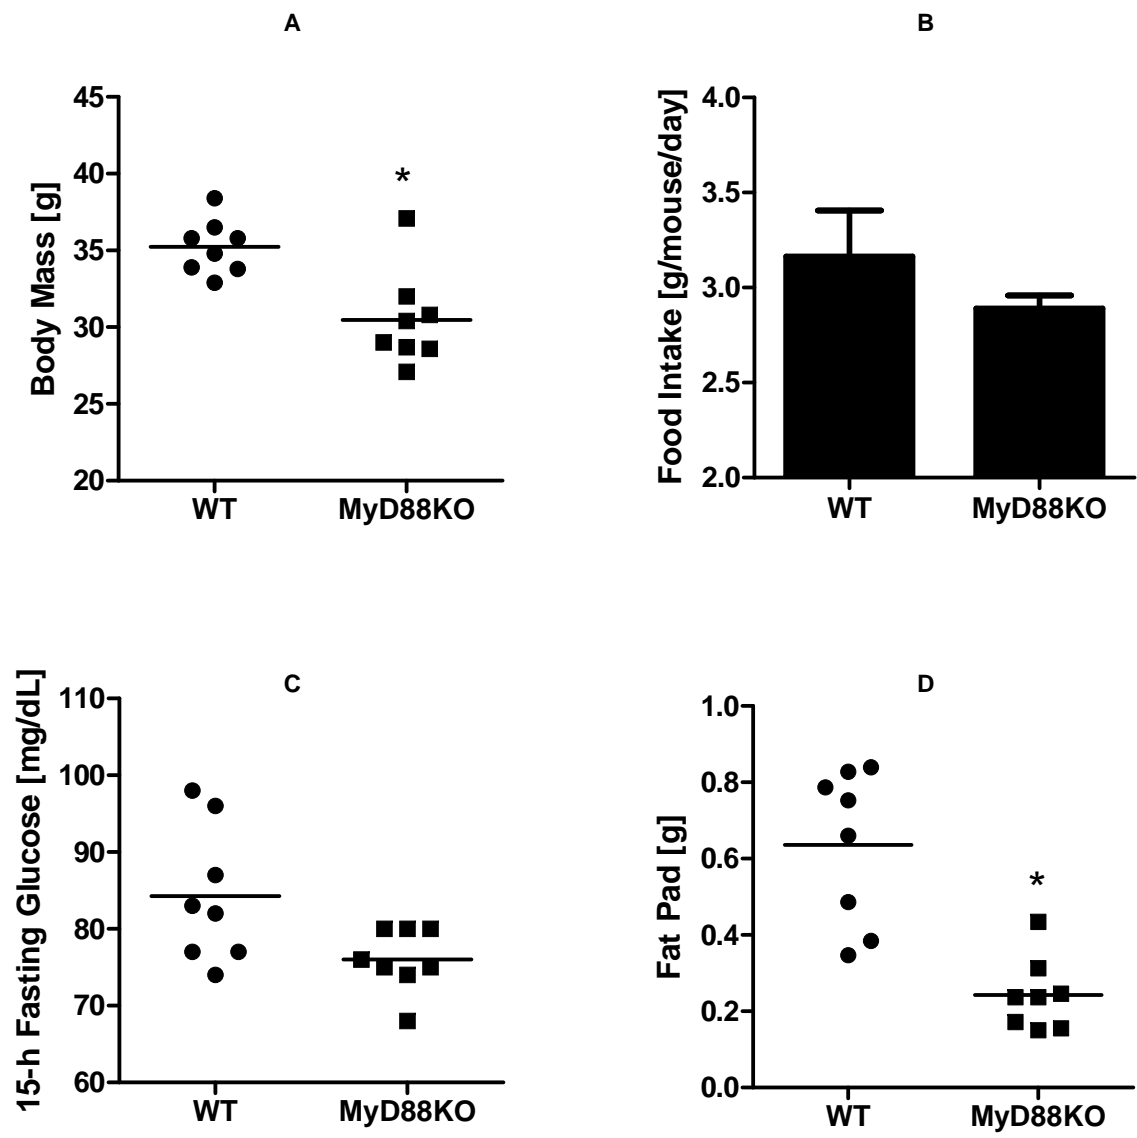

Fig. S11.

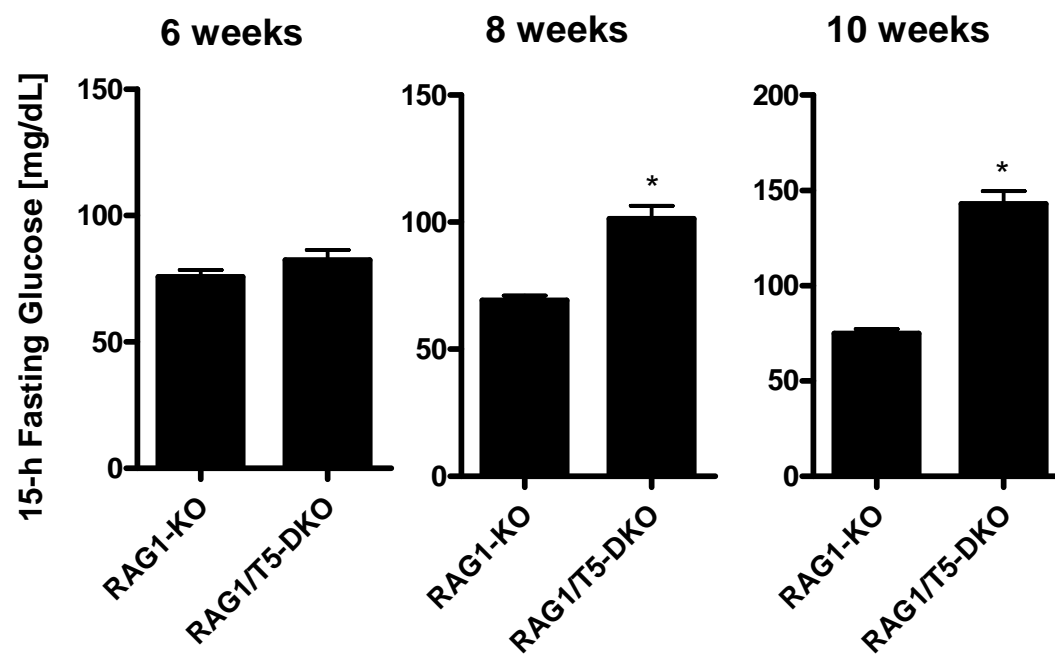

Fig. S12.

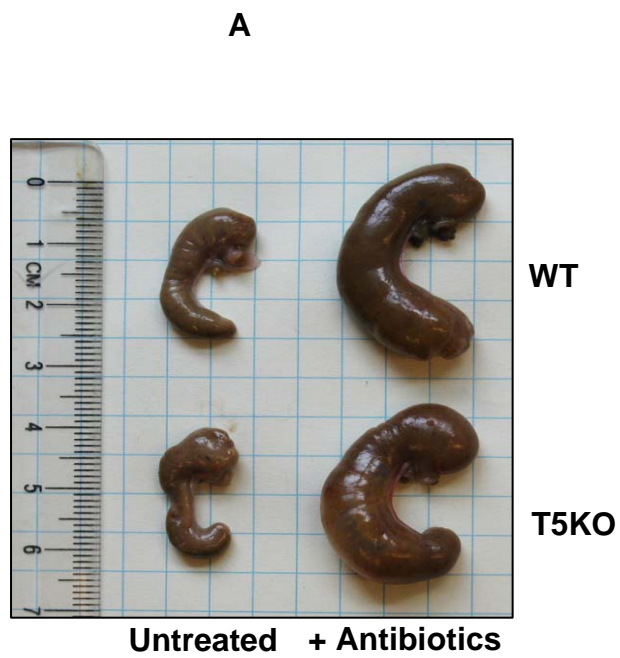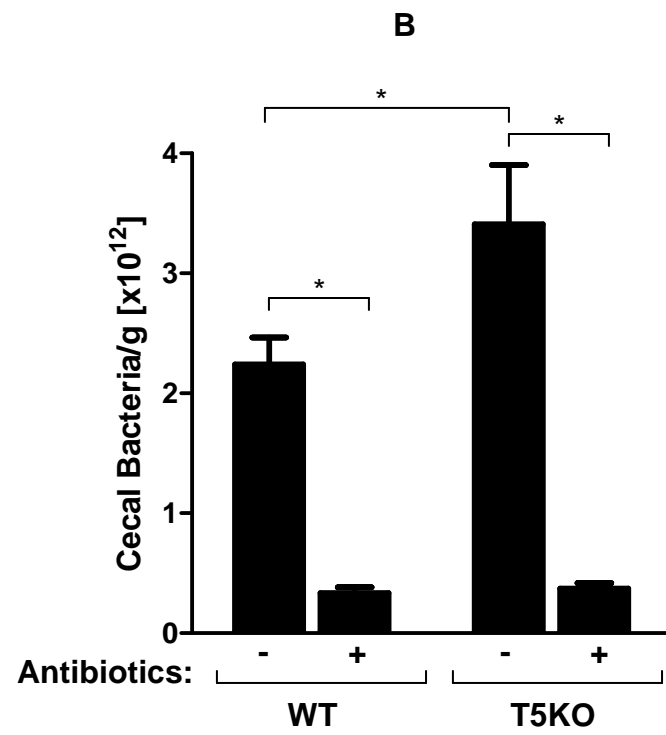

Fig. S13.

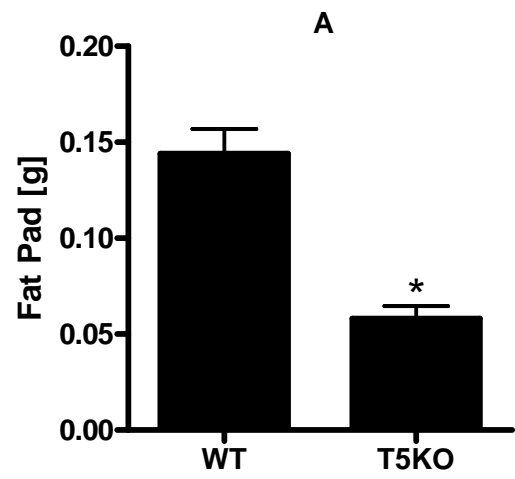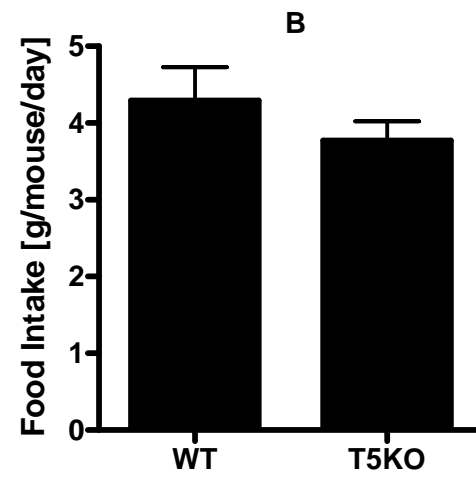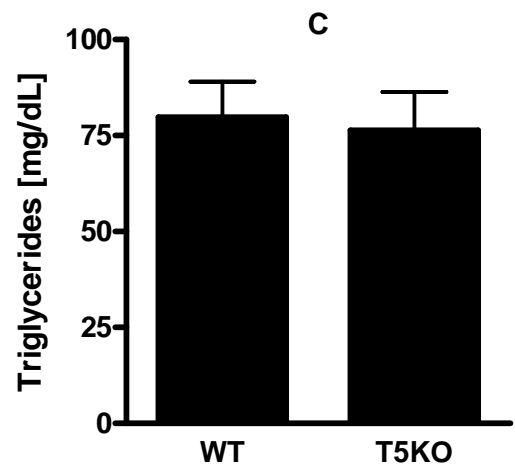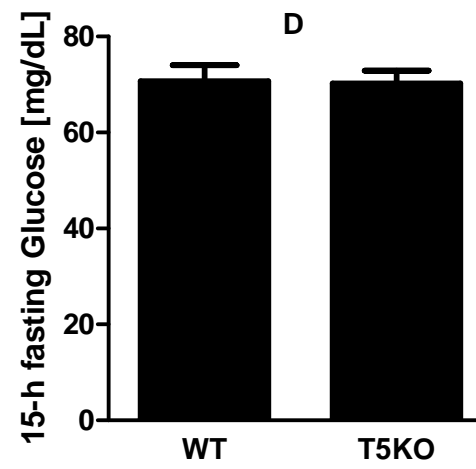

Fig. S14.

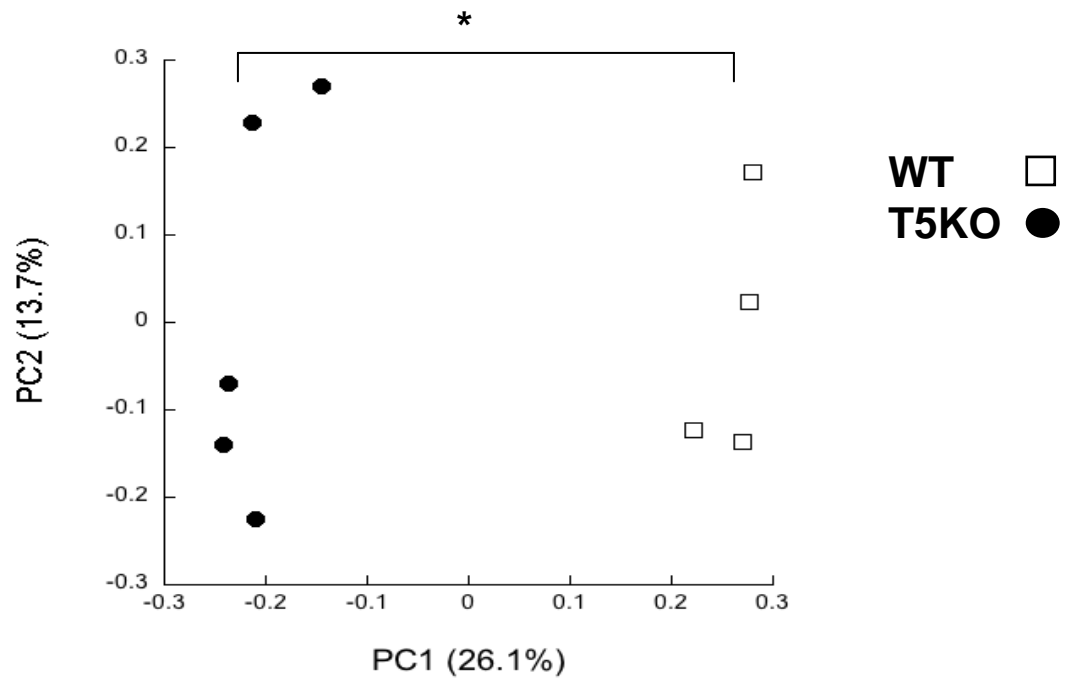

Fig. S15.

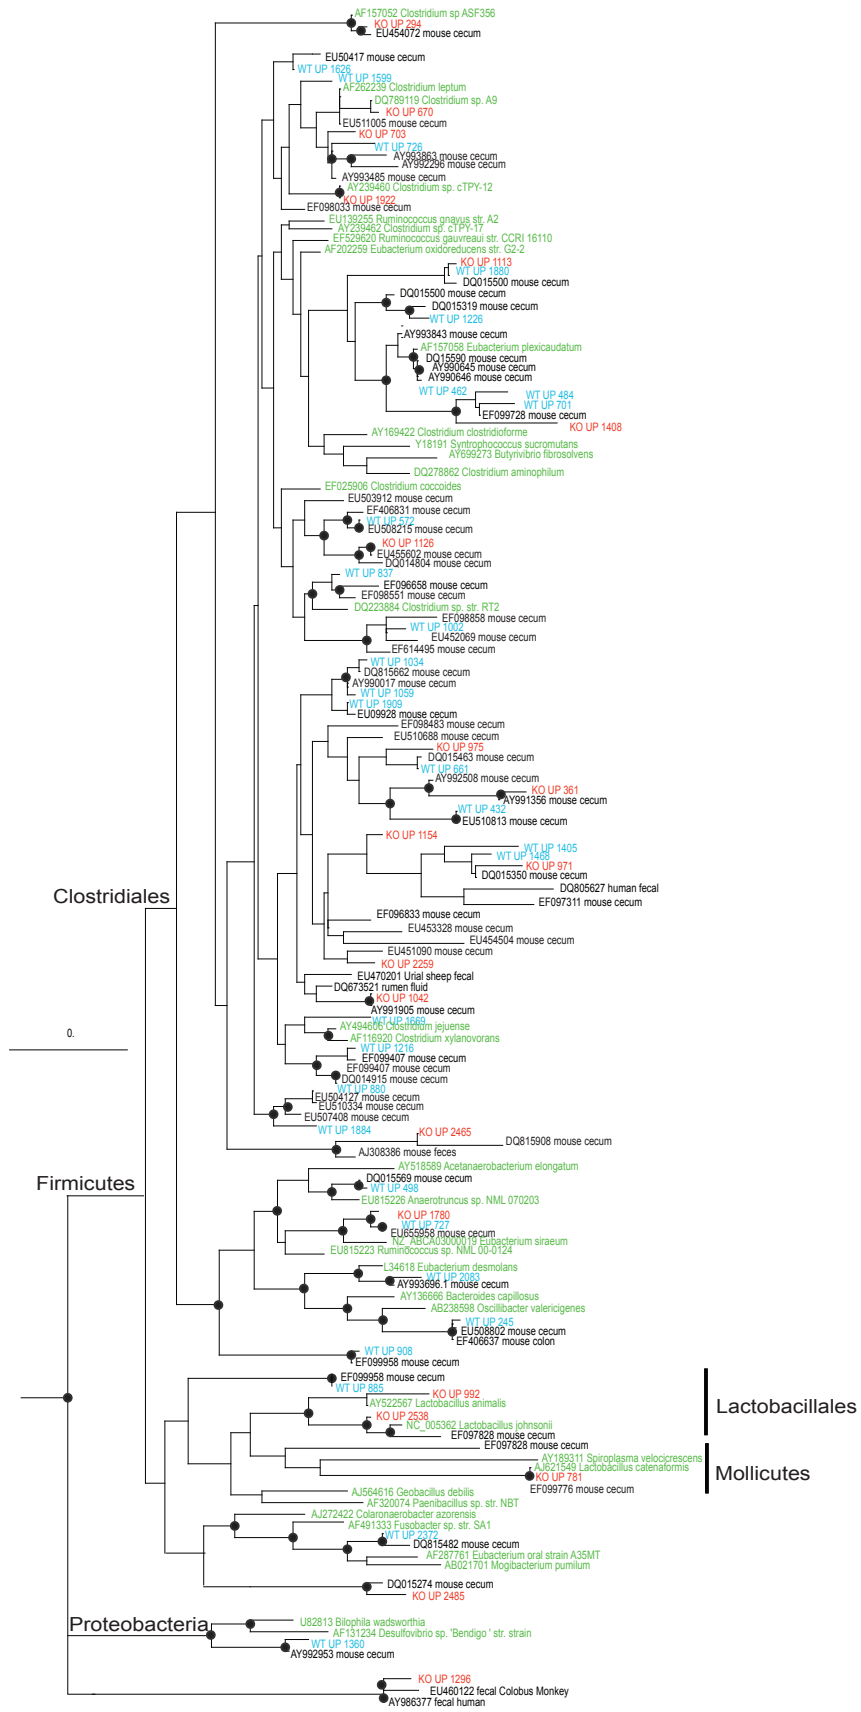

Fig. S16. Altered Firmicutes in T5KO mice.



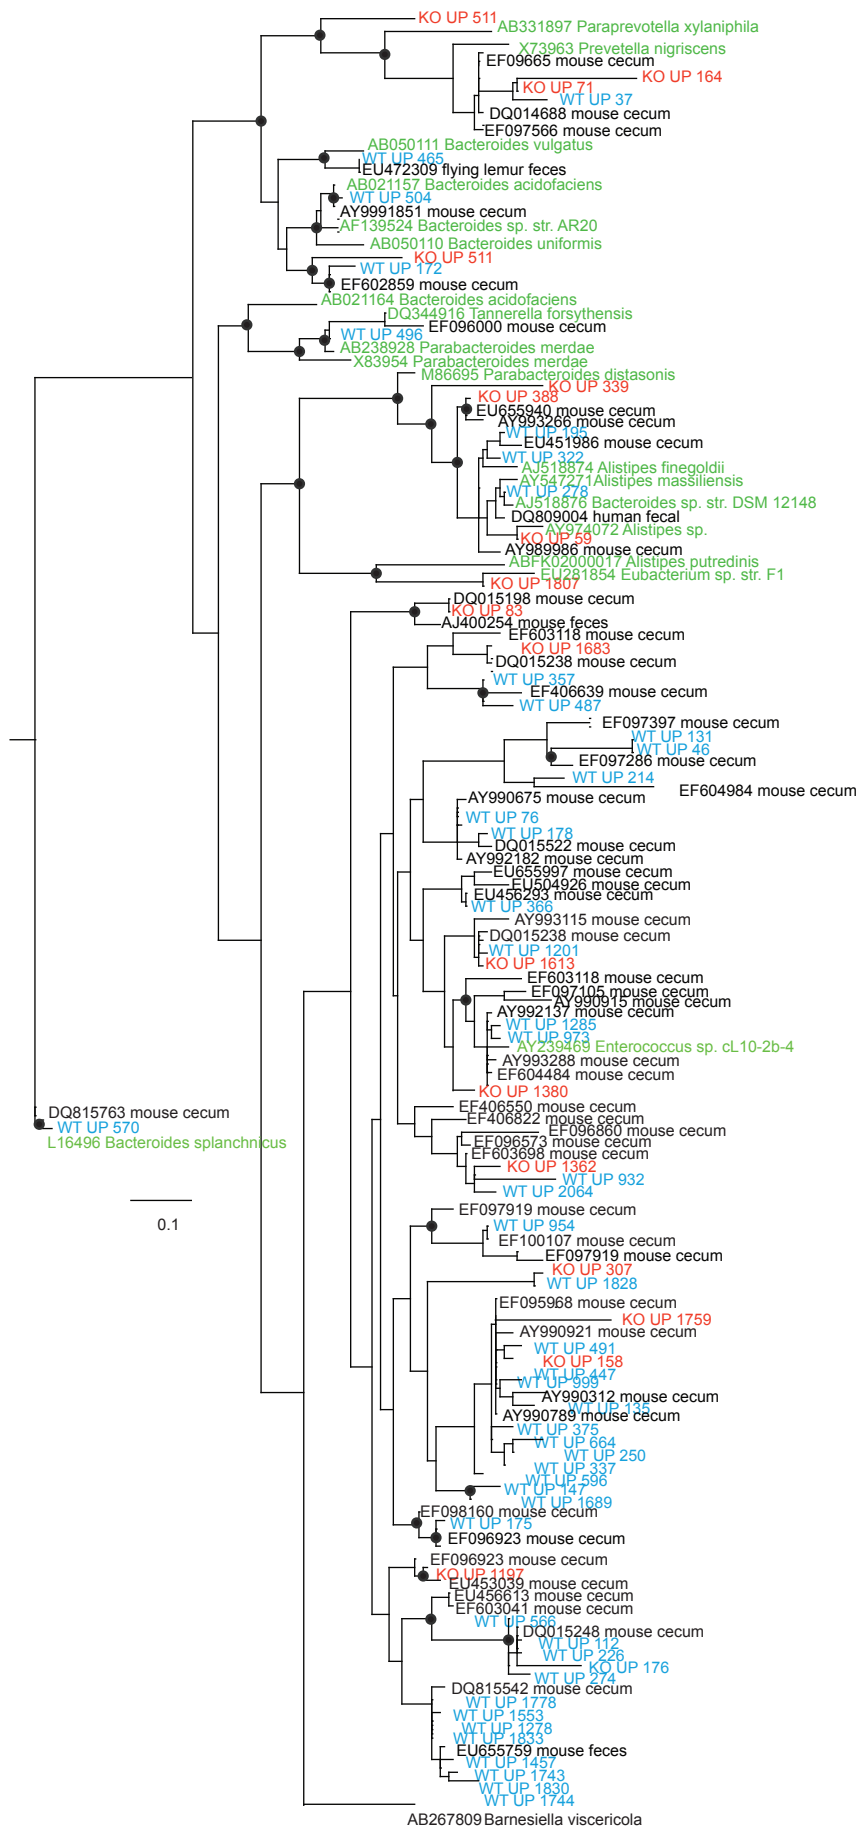

Fig.S17. Altered Bacteroidetes in T5KO mice

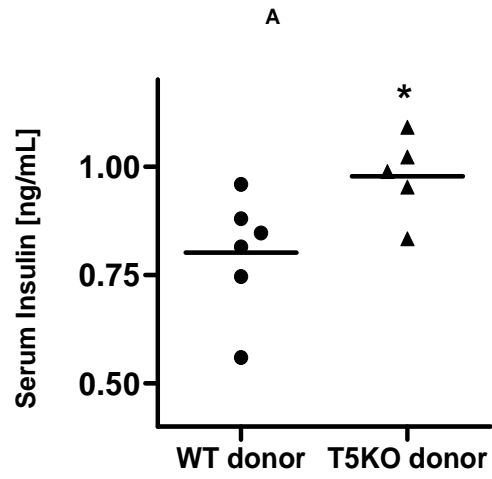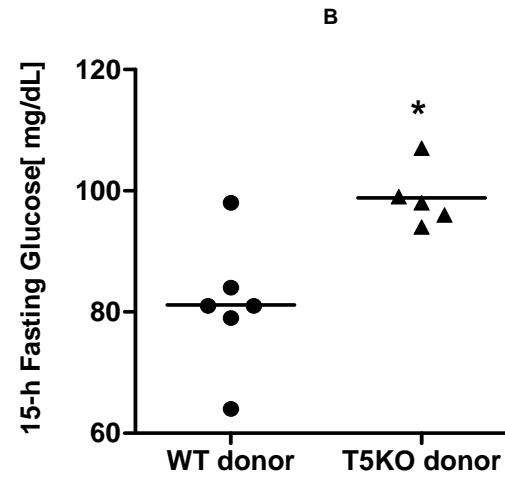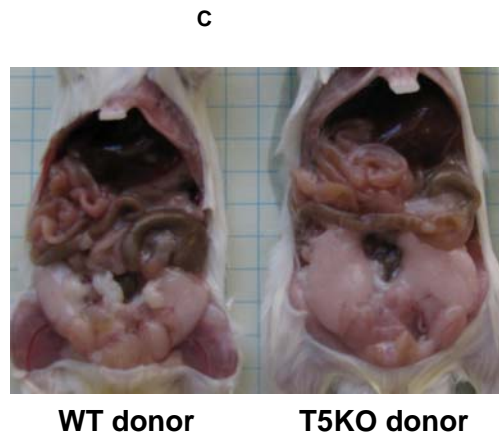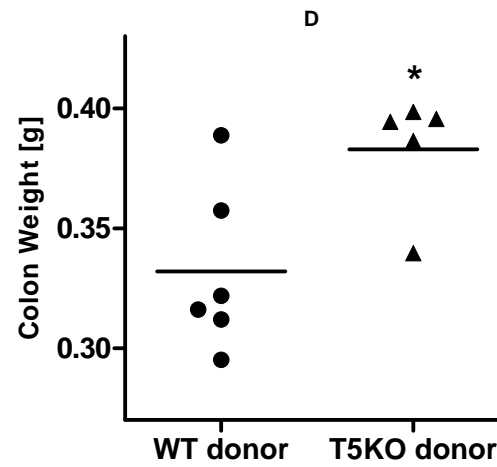

Fig. S18.

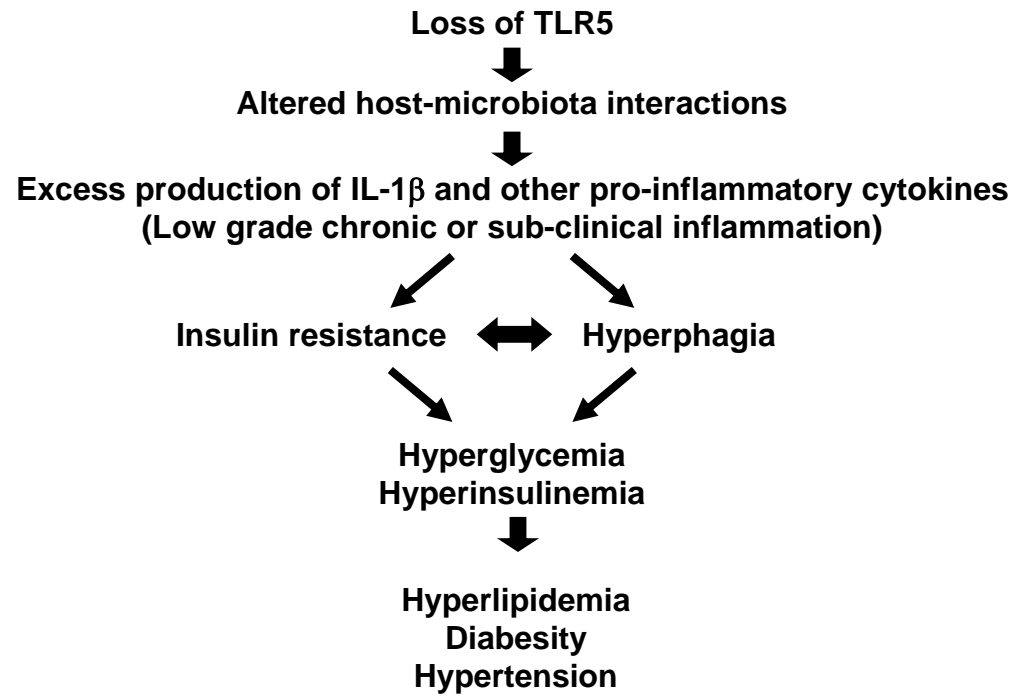

Fig. S19.

Suppl. Table 1: Phylotypes depleted in T5KO versus WT mice.

| TLR5-KO | (se)  | WT    | (se)  | p-value | Phylotype  | Consensus Lineage                                                                |
|---------|-------|-------|-------|---------|------------|----------------------------------------------------------------------------------|
| 0       | 0     | 0.105 | 0.006 | 1.3E-07 | WT_UP_487  | Bacteroidetes                                                                    |
| 0       | 0     | 1.002 | 0.088 | 3.6E-06 | WT_UP_46   | Bacteroidetes                                                                    |
| 0       | 0     | 0.775 | 0.074 | 6.9E-06 | WT_UP_1278 | Bacteroidetes                                                                    |
| 0       | 0     | 0.595 | 0.074 | 3.9E-05 | WT_UP_1778 | Bacteroidetes                                                                    |
| 0.034   | 0.017 | 0.242 | 0.016 | 4.6E-05 | WT_UP_954  | Bacteroidetes                                                                    |
| 0       | 0     | 0.081 | 0.012 | 1.4E-04 | WT_UP_1689 | Bacteroidetes                                                                    |
| 0       | 0     | 0.805 | 0.123 | 1.4E-04 | WT_UP_1553 | Bacteroidetes                                                                    |
| 0       | 0     | 0.286 | 0.056 | 6.6E-04 | WT_UP_570  | Bacteroidetes                                                                    |
| 0       | 0     | 0.186 | 0.042 | 1.6E-03 | WT_UP_1844 | Bacteroidetes                                                                    |
| 0       | 0     | 0.284 | 0.070 | 2.4E-03 | WT_UP_1201 | Bacteroidetes                                                                    |
| 0.006   | 0.006 | 0.093 | 0.021 | 3.3E-03 | WT_UP_226  | Bacteroidetes                                                                    |
| 0       | 0     | 0.086 | 0.023 | 3.8E-03 | WT_UP_250  | Bacteroidetes                                                                    |
| 0.019   | 0.019 | 0.305 | 0.076 | 4.8E-03 | WT_UP_337  | Bacteroidetes                                                                    |
| 0       | 0     | 0.087 | 0.025 | 5.0E-03 | WT_UP_1468 | Bacteroidetes                                                                    |
| 0       | 0     | 0.037 | 0.012 | 1.1E-02 | WT_UP_178  | Bacteroidetes                                                                    |
| 0       | 0     | 0.037 | 0.012 | 1.1E-02 | WT_UP_999  | Bacteroidetes                                                                    |
| 0       | 0     | 0.143 | 0.049 | 1.3E-02 | WT_UP_1285 | Bacteroidetes                                                                    |
| 0.063   | 0.047 | 0.298 | 0.056 | 1.4E-02 | WT_UP_664  | Bacteroidetes                                                                    |
| 0.009   | 0.009 | 0.043 | 0.006 | 1.8E-02 | WT_UP_112  | Bacteroidetes                                                                    |
| 0       | 0     | 0.093 | 0.035 | 2.0E-02 | WT_UP_375  | Bacteroidetes                                                                    |
| 0.006   | 0.006 | 0.100 | 0.035 | 2.2E-02 | WT_UP_135  | Bacteroidetes                                                                    |
| 0       | 0     | 0.050 | 0.020 | 2.6E-02 | WT_UP_76   | Bacteroidetes                                                                    |
| 0       | 0     | 0.050 | 0.020 | 2.6E-02 | WT_UP_245  | Bacteroidetes                                                                    |
| 0       | 0     | 0.050 | 0.021 | 2.9E-02 | WT_UP_357  | Bacteroidetes                                                                    |
| 0       | 0     | 0.086 | 0.037 | 3.2E-02 | WT_UP_1405 | Bacteroidetes                                                                    |
| 0       | 0     | 0.074 | 0.032 | 3.2E-02 | WT_UP_447  | Bacteroidetes                                                                    |
| 0.065   | 0.028 | 0.191 | 0.040 | 3.2E-02 | WT_UP_2064 | Bacteroidetes                                                                    |
| 0       | 0     | 0.204 | 0.088 | 3.3E-02 | WT_UP_147  | Bacteroidetes                                                                    |
| 0       | 0     | 0.125 | 0.059 | 4.8E-02 | WT_UP_932  | Bacteroidetes                                                                    |
| 0       | 0     | 0.390 | 0.019 | 8.0E-08 | WT_UP_1744 | Bacteroidetes; Bacteroidetes                                                     |
| 0       | 0     | 6.162 | 0.355 | 2.1E-07 | WT_UP_1833 | Bacteroidetes; Bacteroidetes                                                     |
| 0       | 0     | 1.214 | 0.127 | 1.2E-05 | WT_UP_596  | Bacteroidetes; Bacteroidetes                                                     |
| 0       | 0     | 0.074 | 0.015 | 6.6E-04 | WT_UP_973  | Bacteroidetes; Bacteroidetes                                                     |
| 0       | 0     | 0.130 | 0.028 | 1.1E-03 | WT_UP_1743 | Bacteroidetes; Bacteroidetes                                                     |
| 0       | 0     | 0.118 | 0.029 | 2.3E-03 | WT_UP_1457 | Bacteroidetes; Bacteroidetes                                                     |
| 0       | 0     | 0.056 | 0.016 | 5.7E-03 | WT_UP_491  | Bacteroidetes; Bacteroidetes                                                     |
| 0.055   | 0.037 | 0.261 | 0.043 | 8.2E-03 | WT_UP_175  | Bacteroidetes; Bacteroidetes                                                     |
| 0       | 0     | 0.099 | 0.035 | 1.4E-02 | WT_UP_1830 | Bacteroidetes; Bacteroidetes                                                     |
| 0       | 0     | 0.062 | 0.024 | 2.1E-02 | WT_UP_274  | Bacteroidetes; Bacteroidetes                                                     |
| 0       | 0     | 0.050 | 0.021 | 2.9E-02 | WT_UP_465  | Bacteroidetes; Bacteroidetes                                                     |
| 0       | 0     | 0.074 | 0.032 | 3.3E-02 | WT_UP_214  | Bacteroidetes; Bacteroidetes                                                     |
| 0       | 0     | 0.050 | 0.000 | 6.9E-13 | WT_UP_131  | Bacteroidetes; Bacteroidetes; Bacteroidales                                      |
| 0       | 0     | 0.068 | 0.019 | 4.5E-03 | WT_UP_366  | Bacteroidetes; Bacteroidetes; Bacteroidales                                      |
| 0       | 0     | 0.049 | 0.020 | 2.7E-02 | WT_UP_566  | Bacteroidetes; Bacteroidetes; Bacteroidales                                      |
| 0       | 0     | 0.197 | 0.049 | 2.5E-03 | WT_UP_172  | Bacteroidetes; Bacteroidetes; Bacteroidales; Bacteroidaceae; Bacteroides         |
| 0       | 0     | 0.539 | 0.141 | 3.4E-03 | WT_UP_504  | Bacteroidetes; Bacteroidetes; Bacteroidales; Bacteroidaceae; Bacteroides         |
| 0       | 0     | 0.565 | 0.072 | 4.6E-05 | WT_UP_496  | Bacteroidetes; Bacteroidetes; Bacteroidales; Porphyromonadaceae; Parabacteroides |
| 0       | 0     | 2.501 | 0.452 | 4.0E-04 | WT_UP_1828 | Bacteroidetes; Bacteroidetes; Bacteroidales; Porphyromonadaceae; Parabacteroides |
| 0       | 0     | 0.253 | 0.067 | 3.6E-03 | WT_UP_37   | Bacteroidetes; Bacteroidetes; Bacteroidales; Prevotellaceae                      |
| 0       | 0     | 0.105 | 0.029 | 4.4E-03 | WT_UP_322  | Bacteroidetes; Bacteroidetes; Bacteroidales; Rikenellaceae; Alistipes            |
| 0       | 0     | 0.068 | 0.023 | 1.3E-02 | WT_UP_195  | Bacteroidetes; Bacteroidetes; Bacteroidales; Rikenellaceae; Alistipes            |
| 0.015   | 0.009 | 0.249 | 0.095 | 2.7E-02 | WT_UP_278  | Bacteroidetes; Bacteroidetes; Bacteroidales; Rikenellaceae; Alistipes            |
| 0.007   | 0.007 | 2.513 | 0.264 | 1.3E-05 | WT_UP_701  | Firmicutes                                                                       |
| 0.051   | 0.027 | 0.346 | 0.043 | 5.3E-04 | WT_UP_885  | Firmicutes                                                                       |
| 0       | 0     | 0.062 | 0.012 | 6.1E-04 | WT_UP_2372 | Firmicutes; Clostridia; Clostridiales                                            |
| 0       | 0     | 0.093 | 0.026 | 4.8E-03 | WT_UP_1880 | Firmicutes; Clostridia; Clostridiales                                            |
| 0       | 0     | 0.273 | 0.016 | 2.0E-07 | WT_UP_1002 | Firmicutes; Clostridia; Clostridiales; Lachnospiraceae                           |
| 0.119   | 0.098 | 1.868 | 0.171 | 3.3E-05 | WT_UP_1909 | Firmicutes; Clostridia; Clostridiales; Lachnospiraceae                           |
| 0       | 0     | 0.482 | 0.070 | 1.1E-04 | WT_UP_1599 | Firmicutes; Clostridia; Clostridiales; Lachnospiraceae                           |
| 0       | 0     | 0.253 | 0.044 | 3.1E-04 | WT_UP_1626 | Firmicutes; Clostridia; Clostridiales; Lachnospiraceae                           |
| 0       | 0     | 0.161 | 0.031 | 5.8E-04 | WT_UP_837  | Firmicutes; Clostridia; Clostridiales; Lachnospiraceae                           |
| 0.019   | 0.012 | 0.111 | 0.012 | 9.5E-04 | WT_UP_1669 | Firmicutes; Clostridia; Clostridiales; Lachnospiraceae                           |
| 0.006   | 0.006 | 0.254 | 0.052 | 1.1E-03 | WT_UP_432  | Firmicutes; Clostridia; Clostridiales; Lachnospiraceae                           |
| 0       | 0     | 0.160 | 0.041 | 3.1E-03 | WT_UP_726  | Firmicutes; Clostridia; Clostridiales; Lachnospiraceae                           |
| 0       | 0     | 0.205 | 0.058 | 5.0E-03 | WT_UP_661  | Firmicutes; Clostridia; Clostridiales; Lachnospiraceae                           |
| 0       | 0     | 0.056 | 0.016 | 5.7E-03 | WT_UP_880  | Firmicutes; Clostridia; Clostridiales; Lachnospiraceae                           |
| 0       | 0     | 0.729 | 0.213 | 5.9E-03 | WT_UP_1034 | Firmicutes; Clostridia; Clostridiales; Lachnospiraceae                           |
| 0       | 0     | 0.037 | 0.012 | 1.1E-02 | WT_UP_462  | Firmicutes; Clostridia; Clostridiales; Lachnospiraceae                           |
| 0.016   | 0.010 | 0.062 | 0.012 | 2.4E-02 | WT_UP_572  | Firmicutes; Clostridia; Clostridiales; Lachnospiraceae                           |
| 0.019   | 0.012 | 0.094 | 0.026 | 2.6E-02 | WT_UP_1059 | Firmicutes; Clostridia; Clostridiales; Lachnospiraceae                           |
| 0.073   | 0.057 | 0.868 | 0.319 | 2.8E-02 | WT_UP_1216 | Firmicutes; Clostridia; Clostridiales; Lachnospiraceae                           |
| 0.082   | 0.026 | 0.248 | 0.070 | 4.4E-02 | WT_UP_1226 | Firmicutes; Clostridia; Clostridiales; Lachnospiraceae                           |
| 0       | 0     | 0.174 | 0.015 | 4.0E-06 | WT_UP_727  | Firmicutes; Clostridia; Clostridiales; Ruminococcaceae                           |
| 0       | 0     | 0.124 | 0.032 | 2.9E-03 | WT_UP_2083 | Firmicutes; Clostridia; Clostridiales; Ruminococcaceae                           |
| 0.067   | 0.030 | 0.324 | 0.081 | 1.4E-02 | WT_UP_908  | Firmicutes; Clostridia; Clostridiales; Ruminococcaceae                           |
| 0       | 0     | 0.050 | 0.020 | 2.6E-02 | WT_UP_498  | Firmicutes; Clostridia; Clostridiales; Ruminococcaceae; Anaerotruncus            |
| 0       | 0     | 0.285 | 0.079 | 4.6E-03 | WT_UP_582  | ProteoBetalproteobacteria                                                        |
| 0       | 0     | 0.074 | 0.032 | 3.2E-02 | WT_UP_1360 | ProteoDeltaproteobacteria                                                        |
| 0.015   | 0.009 | 0.050 | 0.000 | 1.4E-02 | WT_UP_484  | Unclassified-Screened                                                            |

Suppl. Table 2: Phylotypes enriched in T5KO versus WT mice.

| TLR5-KO | (se)  | WT    | (se)  | p-value | Phylotype  | Consensus Lineage                                                                    |
|---------|-------|-------|-------|---------|------------|--------------------------------------------------------------------------------------|
| 0.732   | 0.176 | 0     | 0     | 8.0E-03 | KO_UP_1362 | Bacteroidetes                                                                        |
| 0.189   | 0.051 | 0     | 0     | 1.4E-02 | KO_UP_1807 | Bacteroidetes                                                                        |
| 0.032   | 0.009 | 0     | 0     | 1.4E-02 | KO_UP_307  | Bacteroidetes                                                                        |
| 1.563   | 0.465 | 0     | 0     | 2.1E-02 | KO_UP_1683 | Bacteroidetes                                                                        |
| 0.051   | 0.015 | 0     | 0     | 2.1E-02 | KO_UP_971  | Bacteroidetes                                                                        |
| 0.053   | 0.018 | 0     | 0     | 3.5E-02 | KO_UP_1759 | Bacteroidetes                                                                        |
| 1.172   | 0.279 | 0.390 | 0.033 | 4.3E-02 | KO_UP_1613 | Bacteroidetes                                                                        |
| 0.079   | 0.028 | 0     | 0     | 4.3E-02 | KO_UP_388  | Bacteroidetes                                                                        |
| 0.350   | 0.108 | 0.050 | 0.020 | 4.5E-02 | KO_UP_158  | Bacteroidetes                                                                        |
| 0.278   | 0.034 | 0     | 0     | 1.8E-04 | KO_UP_1380 | Bacteroidetes; Bacteroidetes                                                         |
| 0.098   | 0.018 | 0.012 | 0.012 | 7.0E-03 | KO_UP_176  | Bacteroidetes; Bacteroidetes                                                         |
| 0.044   | 0.016 | 0     | 0     | 4.3E-02 | KO_UP_83   | Bacteroidetes; Bacteroidetes                                                         |
| 0.973   | 0.176 | 0.198 | 0.034 | 6.3E-03 | KO_UP_1197 | Bacteroidetes; Bacteroidetes; Bacteroidales                                          |
| 0.189   | 0.066 | 0     | 0     | 3.8E-02 | KO_UP_511  | Bacteroidetes; Bacteroidetes; Bacteroidales; Bacteroidaceae; Bacteroides             |
| 0.040   | 0.014 | 0     | 0     | 4.1E-02 | KO_UP_164  | Bacteroidetes; Bacteroidetes; Bacteroidales; Prevotellaceae                          |
| 0.040   | 0.015 | 0     | 0     | 4.6E-02 | KO_UP_71   | Bacteroidetes; Bacteroidetes; Bacteroidales; Prevotellaceae                          |
| 0.071   | 0.025 | 0     | 0     | 3.9E-02 | KO_UP_339  | Bacteroidetes; Bacteroidetes; Bacteroidales; Rikenellaceae                           |
| 0.032   | 0.009 | 0     | 0     | 1.4E-02 | KO_UP_59   | Bacteroidetes; Bacteroidetes; Bacteroidales; Rikenellaceae; Alistipes                |
| 0.775   | 0.230 | 0     | 0     | 2.1E-02 | KO_UP_2465 | Firmicutes                                                                           |
| 0.120   | 0.034 | 0.012 | 0.012 | 3.2E-02 | KO_UP_1408 | Firmicutes                                                                           |
| 0.072   | 0.019 | 0.012 | 0.012 | 4.4E-02 | KO_UP_781  | Firmicutes                                                                           |
| 0.049   | 0.017 | 0     | 0     | 4.3E-02 | KO_UP_992  | Firmicutes; Bacilli; Lactobacillales                                                 |
| 0.043   | 0.014 | 0     | 0     | 3.1E-02 | KO_UP_2538 | Firmicutes; Bacilli; Lactobacillales; Lactobacillaceae; Lactobacillus                |
| 5.933   | 1.703 | 0     | 0     | 1.8E-02 | KO_UP_294  | Firmicutes; Clostridia                                                               |
| 0.059   | 0.016 | 0     | 0     | 1.6E-02 | KO_UP_361  | Firmicutes; Clostridia; Clostridiales                                                |
| 0.089   | 0.021 | 0     | 0     | 6.9E-03 | KO_UP_1126 | Firmicutes; Clostridia; Clostridiales; Lachnospiraceae                               |
| 0.083   | 0.023 | 0     | 0     | 1.5E-02 | KO_UP_1922 | Firmicutes; Clostridia; Clostridiales; Lachnospiraceae                               |
| 2.856   | 0.849 | 0     | 0     | 2.1E-02 | KO_UP_670  | Firmicutes; Clostridia; Clostridiales; Lachnospiraceae                               |
| 0.804   | 0.244 | 0     | 0     | 2.3E-02 | KO_UP_1042 | Firmicutes; Clostridia; Clostridiales; Lachnospiraceae                               |
| 0.064   | 0.023 | 0     | 0     | 4.0E-02 | KO_UP_2259 | Firmicutes; Clostridia; Clostridiales; Lachnospiraceae                               |
| 1.319   | 0.470 | 0     | 0     | 4.3E-02 | KO_UP_703  | Firmicutes; Clostridia; Clostridiales; Lachnospiraceae                               |
| 0.098   | 0.036 | 0     | 0     | 4.9E-02 | KO_UP_975  | Firmicutes; Clostridia; Clostridiales; Lachnospiraceae                               |
| 0.384   | 0.073 | 0.086 | 0.042 | 1.3E-02 | KO_UP_1113 | Firmicutes; Clostridia; Clostridiales; Lachnospiraceae; LachnospiraceaeIncertaeSedis |
| 0.202   | 0.042 | 0     | 0     | 3.7E-03 | KO_UP_1780 | Firmicutes; Clostridia; Clostridiales; Ruminococcaceae                               |
| 0.939   | 0.216 | 0     | 0     | 6.4E-03 | KO_UP_1296 | Proteobacteria                                                                       |
| 2.274   | 0.464 | 0     | 0     | 3.5E-03 | KO_UP_1154 | Unclassified-Screened                                                                |
| 0.656   | 0.153 | 0.205 | 0.043 | 3.9E-02 | KO_UP_2485 | Unclassified-Screened                                                                |

Suppl. Table 3: Closest matches between phylotypes obtained in this study and phylotypes obtained from studies of human gut microbiotas (upper table) and mouse gut microbiotas (lower table)

**Best BLAST to sequences derived from humans**

| Phylotype  | %ID | Greengenes ID | Description [Genbank accession number]                                                                                                                                                        |
|------------|-----|---------------|-----------------------------------------------------------------------------------------------------------------------------------------------------------------------------------------------|
| KO_UP_1042 | 94  | 213401        | Selective colonization insoluble human faecal faeces clone D1B-6.5-48h-6 [AM237879.1]                                                                                                         |
| KO_UP_1113 | 97  | 179742        | Microbial ecology: gut microbes obesity human feces; subj02; 52 weeks; fat-r diet clone RL305aal86d02 [DQ799444.1]                                                                            |
| KO_UP_1126 | 92  | 190961        | Microbial ecology: gut microbes obesity human feces; subj10; 12 weeks; carb-r diet clone RL247_aaj22e07 [DQ799971.1]                                                                          |
| KO_UP_1154 | 90  | 145377        | Metagenomic gut microbiome healthy human stool clone EA96 [DQ327520.1]                                                                                                                        |
| KO_UP_1197 | 97  | 119549        | Human stool clone D016 [AY985773.1]                                                                                                                                                           |
| KO_UP_1296 | 97  | 121353        | Human stool clone D164 [AY985884.1]                                                                                                                                                           |
| KO_UP_1362 | 91  | 146438        | Reduced Firmicutes intestinal Crohn's disease human intestine clone Cadhufec26ml [AY850513.1]                                                                                                 |
| KO_UP_1380 | 88  | 174331        | Microbial ecology: gut microbes obesity human feces; subj12; 52 weeks; carb-r diet clone RL304_aal74f01 [DQ824331.1]                                                                          |
| KO_UP_1408 | 100 | 184905        | Microbial ecology: gut microbes obesity human feces; subj07; 12 weeks; carb-r diet clone RL246_aai73f04 [DQ793567.1]                                                                          |
| KO_UP_158  | 94  | 146438        | Reduced Firmicutes intestinal Crohn's disease human intestine clone Cadhufec26ml [AY850513.1]                                                                                                 |
| KO_UP_1613 | 97  | 146438        | Reduced Firmicutes intestinal Crohn's disease human intestine clone Cadhufec26ml [AY850513.1]                                                                                                 |
| KO_UP_164  | 94  | 186661        | Microbial ecology: gut microbes obesity human feces; subj08; 12 weeks; carb-r diet clone RL245_aai83a09 [DQ795828.1]                                                                          |
| KO_UP_1683 | 97  | 173237        | Effect bowel preparation and colonoscopy on post-procedure intestinal microbiota Homo sapiens fecal clone D13-a3 [DQ905194.1]                                                                 |
| KO_UP_1759 | 88  | 174331        | Microbial ecology: gut microbes obesity human feces; subj12; 52 weeks; carb-r diet clone RL304_aal74f01 [DQ824331.1]                                                                          |
| KO_UP_176  | 95  | 119549        | Human stool clone D016 [AY985773.1]                                                                                                                                                           |
| KO_UP_1780 | 94  | 148925        | Human biopsies ulcerative colitis biopsy clone UC7-117 [AJ608247.1]                                                                                                                           |
| KO_UP_1807 | 93  | 194238        | Between Tissue- Intestinal Microfloras Patients Crohn's Disease and Ulcerative Colitis human intestinal biopsies clone CD18 [DQ441269.1]                                                      |
| KO_UP_1922 | 94  | 117065        | Human stool clone B134 [AY984243.1]                                                                                                                                                           |
| KO_UP_2259 | 93  | 182165        | Microbial ecology: gut microbes obesity human feces; subj02; 52 weeks; fat-r diet clone RL305aal86e04 [DQ799456.1]                                                                            |
| KO_UP_2465 | 92  | 190003        | Microbial ecology: gut microbes obesity human feces; subj08; 26 weeks; carb-r diet clone RL202_aai50e10 [DQ796036.1]                                                                          |
| KO_UP_2485 | 95  | 114444        | Human ascending colon biopsy clone LW88 [AY916186.1]                                                                                                                                          |
| KO_UP_2538 | 97  | 132527        | Microbes on human vaginal epithelium clone rRNA121 [AY958894.1]                                                                                                                               |
| KO_UP_294  | 92  | 192517        | Between Tissue- Intestinal Microfloras Patients Crohn's Disease and Ulcerative Colitis human intestinal biopsies clone CD104 [DQ441355.1]                                                     |
| KO_UP_307  | 96  | 146438        | Reduced Firmicutes intestinal Crohn's disease human intestine clone Cadhufec26ml [AY850513.1]                                                                                                 |
| KO_UP_339  | 89  | 112720        | Human transverse colon biopsy clone NH37 [AY916174.1]                                                                                                                                         |
| KO_UP_361  | 96  | 189690        | Microbial ecology: gut microbes obesity human feces; subj05; 0 weeks; fat-r diet clone RL180_aah38f04 [DQ807896.1]                                                                            |
| KO_UP_388  | 90  | 198374        | Microbial ecology: gut microbes obesity human feces; subj14; 52 weeks; lean control clone RL388_aao94a06 [DQ801324.1]                                                                         |
| KO_UP_511  | 96  | 47157         | Bacteroides uniformis str. JCM 5828T [AB050110.1]                                                                                                                                             |
| KO_UP_59   | 94  | 194627        | Microbial ecology: gut microbes obesity human feces; subj06; 12 weeks; fat-r diet clone RL243_aai88a12 [DQ809004.1]                                                                           |
| KO_UP_670  | 98  | 187212        | Microbial ecology: gut microbes obesity human feces; subj02; 12 weeks; fat-r diet clone RL242_aak00d07 [DQ799014.1]                                                                           |
| KO_UP_703  | 96  | 180842        | Microbial ecology: gut microbes obesity human feces; subj03; 12 weeks; fat-r diet clone RL251_aaj86e06 [DQ803493.1]                                                                           |
| KO_UP_71   | 95  | 92223         | Human oral cavity clone GI030 [AY349395.1]                                                                                                                                                    |
| KO_UP_781  | 93  | 150015        | Metagenomic gut microbiome healthy human stool clone B551 [DQ325818.1]                                                                                                                        |
| KO_UP_83   | 95  | 117284        | Human stool clone C482 [AY985514.1]                                                                                                                                                           |
| KO_UP_971  | 97  | 113069        | Human stool clone D761 [AY916386.1]                                                                                                                                                           |
| KO_UP_975  | 88  | 13997         | Ruminococcus hydrogenotrophicus str. S5a36 [X95624.1]                                                                                                                                         |
| KO_UP_992  | 94  | 149197        | Metagenomic gut microbiome healthy human stool clone E756 [DQ327224.1]                                                                                                                        |
| WT_UP_1002 | 92  | 118072        | Human ascending colon mucosal biopsy clone LT31 [AY975998.1]                                                                                                                                  |
| WT_UP_1034 | 95  | 181763        | Microbial ecology: gut microbes obesity human feces; subj03; 0 weeks; fat-r diet clone RL187_aah68b02 [DQ804070.1]                                                                            |
| WT_UP_1059 | 94  | 181706        | Microbial ecology: gut microbes obesity human feces; subj03; 0 weeks; fat-r diet clone RL187_aah69a12 [DQ804131.1]                                                                            |
| WT_UP_112  | 96  | 119549        | Human stool clone D016 [AY985773.1]                                                                                                                                                           |
| WT_UP_1201 | 97  | 146438        | Reduced Firmicutes intestinal Crohn's disease human intestine clone Cadhufec26ml [AY850513.1]                                                                                                 |
| WT_UP_1216 | 93  | 199637        | Microbial ecology: gut microbes obesity human feces; subj06; 0 weeks; fat-r diet clone RL184_aan81f06 [DQ809619.1]                                                                            |
| WT_UP_1226 | 91  | 149210        | Metagenomic gut microbiome healthy human stool clone E565 [DQ327057.1]                                                                                                                        |
| WT_UP_1278 | 97  | 119549        | Human stool clone D016 [AY985773.1]                                                                                                                                                           |
| WT_UP_1285 | 98  | 146438        | Reduced Firmicutes intestinal Crohn's disease human intestine clone Cadhufec26ml [AY850513.1]                                                                                                 |
| WT_UP_131  | 95  | 117284        | Human stool clone C482 [AY985514.1]                                                                                                                                                           |
| WT_UP_135  | 95  | 146438        | Reduced Firmicutes intestinal Crohn's disease human intestine clone Cadhufec26ml [AY850513.1]                                                                                                 |
| WT_UP_1360 | 93  | 172513        | Effect bowel preparation and colonoscopy on post-procedure intestinal microbiota Homo sapiens fecal clone 002-e12 [DQ904964.1]                                                                |
| WT_UP_1405 | 98  | 113069        | Human stool clone D761 [AY916386.1]                                                                                                                                                           |
| WT_UP_1457 | 93  | 146438        | Reduced Firmicutes intestinal Crohn's disease human intestine clone Cadhufec26ml [AY850513.1]                                                                                                 |
| WT_UP_1468 | 87  | 146438        | Reduced Firmicutes intestinal Crohn's disease human intestine clone Cadhufec26ml [AY850513.1]                                                                                                 |
| WT_UP_147  | 93  | 119549        | Human stool clone D016 [AY985773.1]                                                                                                                                                           |
| WT_UP_1553 | 94  | 146438        | Reduced Firmicutes intestinal Crohn's disease human intestine clone Cadhufec26ml [AY850513.1]                                                                                                 |
| WT_UP_1599 | 96  | 177738        | Microbial ecology: gut microbes obesity human feces; subj02; 26 weeks; fat-r diet clone RL205_aaj19g03 [DQ799251.1]                                                                           |
| WT_UP_1626 | 95  | 121393        | Human ascending colon mucosal biopsy clone KN24 [AY975195.1]                                                                                                                                  |
| WT_UP_1669 | 92  | 203854        | Symbiotic gut microbes modulate metabolic phenotypes human fecal subject MO clone SJTU_G_02_14 [EF405321.1]                                                                                   |
| WT_UP_1689 | 90  | 209529        | Gastrointestinal tract microbiota microarray reference pool created pooling products obtained human adult infant stool breast milk and vaginal swabs mothers clone 1099945077996 [EF434334.1] |
| WT_UP_172  | 91  | 116794        | Human stool clone C086 [AY985222.1]                                                                                                                                                           |
| WT_UP_1743 | 93  | 146438        | Reduced Firmicutes intestinal Crohn's disease human intestine clone Cadhufec26ml [AY850513.1]                                                                                                 |
| WT_UP_1744 | 94  | 146438        | Reduced Firmicutes intestinal Crohn's disease human intestine clone Cadhufec26ml [AY850513.1]                                                                                                 |
| WT_UP_175  | 94  | 175793        | Microbial ecology: gut microbes obesity human feces; subj12; 52 weeks; carb-r diet clone RL304_aal75d12 [DQ824388.1]                                                                          |

|            |     |        |                                                                                                                                                                                               |
|------------|-----|--------|-----------------------------------------------------------------------------------------------------------------------------------------------------------------------------------------------|
| WT_UP_1778 | 96  | 146438 | Reduced Firmicutes intestinal Crohn's disease human intestine clone Cadhufec26ml [AY850513.1]                                                                                                 |
| WT_UP_178  | 91  | 119549 | Human stool clone D016 [AY985773.1]                                                                                                                                                           |
| WT_UP_1828 | 99  | 123030 | Human ascending colon mucosal biopsy clone LS52 [AY975943.1]                                                                                                                                  |
| WT_UP_1830 | 94  | 146438 | Reduced Firmicutes intestinal Crohn's disease human intestine clone Cadhufec26ml [AY850513.1]                                                                                                 |
| WT_UP_1833 | 95  | 121050 | Human stool clone D372 [AY986052.1]                                                                                                                                                           |
| WT_UP_1880 | 87  | 174821 | Microbial ecology: gut microbes obesity human feces; subj12; 26 weeks; carb-r diet clone RL204_aaj60g07 [DQ824201.1]                                                                          |
| WT_UP_1884 | 94  | 194697 | Microbial ecology: gut microbes obesity human feces; subj02; 0 weeks; fat-r diet clone RL182_aah33h06 [DQ799802.1]                                                                            |
| WT_UP_1909 | 95  | 187143 | Microbial ecology: gut microbes obesity human feces; subj03; 0 weeks; fat-r diet clone RL187_aah68c12 [DQ804088.1]                                                                            |
| WT_UP_195  | 93  | 112720 | Human transverse colon biopsy clone NH37 [AY916174.1]                                                                                                                                         |
| WT_UP_2064 | 91  | 146438 | Reduced Firmicutes intestinal Crohn's disease human intestine clone Cadhufec26ml [AY850513.1]                                                                                                 |
| WT_UP_2083 | 91  | 173815 | Microbial ecology: gut microbes obesity human feces; subj03; 26 weeks; fat-r diet clone RL200_aai60f02 [DQ803975.1]                                                                           |
| WT_UP_214  | 95  | 117284 | Human stool clone C482 [AY985514.1]                                                                                                                                                           |
| WT_UP_226  | 95  | 119549 | Human stool clone D016 [AY985773.1]                                                                                                                                                           |
| WT_UP_2372 | 92  | 43339  | Human subgingival plaque clone CK047 [AF287762.1]                                                                                                                                             |
| WT_UP_245  | 94  | 209622 | Human infant gastrointestinal tract microbiota stool mother babies 13 and 14 7 months after birth clone C244 [EF434362.1]                                                                     |
| WT_UP_250  | 98  | 146438 | Reduced Firmicutes intestinal Crohn's disease human intestine clone Cadhufec26ml [AY850513.1]                                                                                                 |
| WT_UP_274  | 95  | 119549 | Human stool clone D016 [AY985773.1]                                                                                                                                                           |
| WT_UP_278  | 100 | 213671 | Symbiotic gut microbes modulate metabolic phenotypes human fecal subject GF clone SJTU_B_10_51 [EF402636.1]                                                                                   |
| WT_UP_322  | 94  | 179296 | Microbial ecology: gut microbes obesity human feces; subj12; 26 weeks; carb-r diet clone RL204_aaj57f11 [DQ823978.1]                                                                          |
| WT_UP_337  | 88  | 174331 | Microbial ecology: gut microbes obesity human feces; subj12; 52 weeks; carb-r diet clone RL304_aal74f01 [DQ824331.1]                                                                          |
| WT_UP_357  | 96  | 209529 | Gastrointestinal tract microbiota microarray reference pool created pooling products obtained human adult infant stool breast milk and vaginal swabs mothers clone 1099945077996 [EF434334.1] |
| WT_UP_366  | 96  | 146438 | Reduced Firmicutes intestinal Crohn's disease human intestine clone Cadhufec26ml [AY850513.1]                                                                                                 |
| WT_UP_37   | 96  | 92223  | Human oral cavity clone GI030 [AY349395.1]                                                                                                                                                    |
| WT_UP_375  | 88  | 174331 | Microbial ecology: gut microbes obesity human feces; subj12; 52 weeks; carb-r diet clone RL304_aal74f01 [DQ824331.1]                                                                          |
| WT_UP_432  | 96  | 146579 | Metagenomic gut microbiome healthy human stool clone E010 [DQ326577.1]                                                                                                                        |
| WT_UP_447  | 87  | 174331 | Microbial ecology: gut microbes obesity human feces; subj12; 52 weeks; carb-r diet clone RL304_aal74f01 [DQ824331.1]                                                                          |
| WT_UP_46   | 95  | 117284 | Human stool clone C482 [AY985514.1]                                                                                                                                                           |
| WT_UP_462  | 97  | 184729 | Microbial ecology: gut microbes obesity human feces; subj03; 0 weeks; fat-r diet clone RL187_aah69a08 [DQ804129.1]                                                                            |
| WT_UP_465  | 89  | 178803 | Microbial ecology: gut microbes obesity human feces; subj12; 26 weeks; carb-r diet clone RL204_aaj58d12 [DQ824036.1]                                                                          |
| WT_UP_484  | 100 | 116804 | Human ascending colon mucosal biopsy clone KH22 [AY974867.1]                                                                                                                                  |
| WT_UP_487  | 93  | 173773 | Effect bowel preparation and colonoscopy on post-procedure intestinal microbiota Homo sapiens fecal clone 013-b11 [DQ905202.1]                                                                |
| WT_UP_491  | 88  | 174331 | Microbial ecology: gut microbes obesity human feces; subj12; 52 weeks; carb-r diet clone RL304_aal74f01 [DQ824331.1]                                                                          |
| WT_UP_496  | 95  | 116688 | Human rectum mucosal biopsy clone LL78 [AY980673.1]                                                                                                                                           |
| WT_UP_498  | 89  | 118971 | Human stool clone B722 [AY984761.1]                                                                                                                                                           |
| WT_UP_504  | 97  | 47157  | Bacteroides uniformis str. JCM 5828T [AB050110.1]                                                                                                                                             |
| WT_UP_566  | 98  | 119549 | Human stool clone D016 [AY985773.1]                                                                                                                                                           |
| WT_UP_570  | 91  | 203997 | Symbiotic gut microbes modulate metabolic phenotypes human fecal subject GGM clone SJTU_D_13_11 [EF401651.1]                                                                                  |
| WT_UP_572  | 93  | 182700 | Microbial ecology: gut microbes obesity human feces; subj02; 12 weeks; fat-r diet clone RL242_aaj99b09 [DQ798925.1]                                                                           |
| WT_UP_596  | 88  | 174331 | Microbial ecology: gut microbes obesity human feces; subj12; 52 weeks; carb-r diet clone RL304_aal74f01 [DQ824331.1]                                                                          |
| WT_UP_661  | 94  | 117935 | Human stool clone B293 [AY984391.1]                                                                                                                                                           |
| WT_UP_664  | 88  | 174331 | Microbial ecology: gut microbes obesity human feces; subj12; 52 weeks; carb-r diet clone RL304_aal74f01 [DQ824331.1]                                                                          |
| WT_UP_701  | 96  | 184905 | Microbial ecology: gut microbes obesity human feces; subj07; 12 weeks; carb-r diet clone RL246_aai73f04 [DQ793567.1]                                                                          |
| WT_UP_726  | 94  | 119218 | Human cecum mucosal biopsy clone MV44 [AY977329.1]                                                                                                                                            |
| WT_UP_727  | 93  | 148925 | Human biopsies ulcerative colitis biopsy clone UC7-117 [AJ608247.1]                                                                                                                           |
| WT_UP_76   | 91  | 119549 | Human stool clone D016 [AY985773.1]                                                                                                                                                           |
| WT_UP_837  | 94  | 208029 | Symbiotic gut microbes modulate metabolic phenotypes human fecal subject BB clone SJTU_F_13_20 [EF399598.1]                                                                                   |
| WT_UP_880  | 93  | 119715 | Human transverse colon mucosal biopsy clone Z170 [AY979143.1]                                                                                                                                 |
| WT_UP_885  | 97  | 211800 | Symbiotic gut microbes modulate metabolic phenotypes human fecal subject BB clone SJTU_F_03_88 [EF398446.1]                                                                                   |
| WT_UP_908  | 92  | 205567 | Human infant gastrointestinal tract microbiota stool baby 14 7 months old clone 1099973758462 [EF434338.1]                                                                                    |
| WT_UP_932  | 93  | 146438 | Reduced Firmicutes intestinal Crohn's disease human intestine clone Cadhufec26ml [AY850513.1]                                                                                                 |
| WT_UP_954  | 94  | 173954 | Microbial ecology: gut microbes obesity human feces; subj12; 26 weeks; carb-r diet clone RL204_aaj58d01 [DQ824028.1]                                                                          |
| WT_UP_973  | 87  | 146438 | Reduced Firmicutes intestinal Crohn's disease human intestine clone Cadhufec26ml [AY850513.1]                                                                                                 |
| WT_UP_999  | 89  | 174331 | Microbial ecology: gut microbes obesity human feces; subj12; 52 weeks; carb-r diet clone RL304_aal74f01 [DQ824331.1]                                                                          |

Average 93.6

#### Best BLAST to sequences derived from mice

| Phylotype  | %ID | Greengenes ID | Description [Genbank accession number]                                                                                                                     |
|------------|-----|---------------|------------------------------------------------------------------------------------------------------------------------------------------------------------|
| KO_UP_1042 | 100 | 130142        | Mouse cecum clone C20_f02 [AY991798.1]                                                                                                                     |
| KO_UP_1113 | 96  | 132416        | Mouse cecum clone C9_L04 [AY990737.1]                                                                                                                      |
| KO_UP_1126 | 99  | 133604        | Mouse cecum clone C15_L12 [AY993887.1]                                                                                                                     |
| KO_UP_1154 | 100 | 167204        | Mouse cecum clone (clone) [DQ815411.1]                                                                                                                     |
| KO_UP_1197 | 96  | 131630        | Mouse cecum clone C12_O02 [AY990138.1]                                                                                                                     |
| KO_UP_1296 | 87  | 149308        | Anaplasma phagocytophilum str. Jilin-1 [DQ342324.1]                                                                                                        |
| KO_UP_1362 | 98  | 131677        | Mouse cecum clone C9_A08 [AY990629.1]                                                                                                                      |
| KO_UP_1380 | 98  | 129314        | Mouse cecum clone C13_B16 [AY991253.1]                                                                                                                     |
| KO_UP_1408 | 98  | 206456        | Pathogen-induced host response provides competitive advantage enteropathogens over intestinal microbiota mouse colon clone infected_28days-C8 [EF406822.1] |
| KO_UP_158  | 96  | 129725        | Mouse cecum clone M3_f08 [DQ015402.1]                                                                                                                      |
| KO_UP_1613 | 99  | 133103        | Mouse cecum clone M2_f09_1 [DQ015238.1]                                                                                                                    |

|            |     |        |                                                                                                                                                                              |
|------------|-----|--------|------------------------------------------------------------------------------------------------------------------------------------------------------------------------------|
| KO_UP_164  | 99  | 179810 | Obesity- gut microbiome increased capacity energy harvest cecal contents Mus musculus strain C57BL/6J; lean_recipient leptin genotype +/+ clone SWPT20_aaa03e05 [EF097770.1] |
| KO_UP_1683 | 97  | 196733 | Obesity- gut microbiome increased capacity energy harvest cecal contents Mus musculus strain C57BL/6J; obob_recipient leptin genotype +/+ clone SWPT2_aaa03c02 [EF099162.1]  |
| KO_UP_1759 | 99  | 129725 | Mouse cecum clone M3_f08 [DQ015402.1]                                                                                                                                        |
| KO_UP_176  | 99  | 129838 | Mouse cecum clone M2_h02_3 [DQ015248.1]                                                                                                                                      |
| KO_UP_1780 | 95  | 166612 | Mouse cecum clone (clone) [DQ815739.1]                                                                                                                                       |
| KO_UP_1807 | 99  | 130249 | Mouse cecum clone C21_c14 [AY993071.1]                                                                                                                                       |
| KO_UP_1922 | 98  | 132741 | Mouse cecum clone M2_g02_2 [DQ015189.1]                                                                                                                                      |
| KO_UP_2259 | 97  | 131637 | Mouse cecum clone M3_h08 [DQ015424.1]                                                                                                                                        |
| KO_UP_2465 | 99  | 161771 | Mouse cecum clone (clone) [DQ815908.1]                                                                                                                                       |
| KO_UP_2485 | 96  | 132833 | Mouse cecum clone C23_n17 [AY992664.1]                                                                                                                                       |
| KO_UP_2538 | 97  | 129387 | Mouse cecum clone C12_I15 [AY989956.1]                                                                                                                                       |
| KO_UP_294  | 98  | 129672 | Mouse cecum clone C19_P22 [AY993606.1]                                                                                                                                       |
| KO_UP_307  | 99  | 174375 | Obesity- gut microbiome increased capacity energy harvest cecal contents Mus musculus strain C57BL/6J; obob_recipient leptin genotype +/+ clone SWPT3_aaa01d08 [EF099304.1]  |
| KO_UP_339  | 95  | 162025 | Mouse cecum clone (clone) [DQ815696.1]                                                                                                                                       |
| KO_UP_361  | 99  | 131705 | Mouse cecum clone C23_g16 [AY992502.1]                                                                                                                                       |
| KO_UP_388  | 98  | 129437 | Mouse cecum clone C21_I17 [AY993266.1]                                                                                                                                       |
| KO_UP_511  | 97  | 130153 | Mouse cecum clone C20_h11 [AY991851.1]                                                                                                                                       |
| KO_UP_59   | 99  | 162245 | Mouse cecum clone (clone) [DQ815433.1]                                                                                                                                       |
| KO_UP_670  | 97  | 132301 | Mouse cecum clone M2_1g06 [DQ015322.1]                                                                                                                                       |
| KO_UP_703  | 100 | 131684 | Mouse cecum clone C10_B13 [AY991381.1]                                                                                                                                       |
| KO_UP_71   | 99  | 130079 | Mouse cecum clone M1_d10_1 [DQ014680.1]                                                                                                                                      |
| KO_UP_781  | 100 | 192375 | Obesity- gut microbiome increased capacity energy harvest cecal contents Mus musculus strain C57BL/6J; obob_recipient leptin genotype +/+ clone SWPT4_aaa04b08 [EF099776.1]  |
| KO_UP_83   | 97  | 99034  | Feces clone F18U [AJ400254.2]                                                                                                                                                |
| KO_UP_971  | 97  | 133315 | Mouse cecum clone M2_e05 [DQ015056.1]                                                                                                                                        |
| KO_UP_975  | 94  | 130335 | Mouse cecum clone M3_g05_1 [DQ015495.1]                                                                                                                                      |
| KO_UP_992  | 97  | 189189 | Obesity- gut microbiome increased capacity energy harvest cecal contents Mus musculus strain C57BL/6J; obob_recipient leptin genotype +/+ clone SWPT4_aaa04f05 [EF099809.1]  |
| WT_UP_1002 | 98  | 193103 | Obesity- gut microbiome increased capacity energy harvest cecal contents Mus musculus strain C57BL/6J; obob_recipient leptin genotype +/+ clone SWPT1_aaa02b08 [EF098858.1]  |
| WT_UP_1034 | 97  | 131631 | Mouse cecum clone C9_I14 [AY990665.1]                                                                                                                                        |
| WT_UP_1059 | 99  | 129358 | Mouse cecum clone C22_i13 [AY992917.1]                                                                                                                                       |
| WT_UP_112  | 99  | 129838 | Mouse cecum clone M2_h02_3 [DQ015248.1]                                                                                                                                      |
| WT_UP_1201 | 99  | 133103 | Mouse cecum clone M2_f09_1 [DQ015238.1]                                                                                                                                      |
| WT_UP_1216 | 99  | 175432 | Obesity- gut microbiome increased capacity energy harvest cecal contents Mus musculus strain C57BL/6J; obob_recipient leptin genotype +/+ clone SWPT3_aaa02g12 [EF099407.1]  |
| WT_UP_1226 | 98  | 136647 | Abundant and fungal microbiota murine intestine clone 1252-2 [AY994030.1]                                                                                                    |
| WT_UP_1278 | 87  | 181605 | Obesity- gut microbiome increased capacity energy harvest cecal contents Mus musculus strain C57BL/6J; obob_recipient leptin genotype +/+ clone SWPT5_aaa01f07 [EF099877.1]  |
| WT_UP_1285 | 98  | 129314 | Mouse cecum clone C13_B16 [AY991253.1]                                                                                                                                       |
| WT_UP_131  | 98  | 174456 | Obesity- gut microbiome increased capacity energy harvest cecal contents Mus musculus strain C57BL/6J; lean_recipient leptin genotype +/+ clone SWPT19_aaa02a10 [EF097397.1] |
| WT_UP_135  | 99  | 173912 | Obesity- gut microbiome increased capacity energy harvest cecal contents Mus musculus strain C57BL/6J; obob_recipient leptin genotype +/+ clone SWPT3_aaa04h06 [EF099553.1]  |
| WT_UP_1360 | 98  | 129449 | Mouse cecum clone C21_I20 [AY993269.1]                                                                                                                                       |
| WT_UP_1405 | 94  | 134050 | Mouse cecum clone C4_H031 [AY990863.1]                                                                                                                                       |
| WT_UP_1457 | 96  | 131630 | Mouse cecum clone C12_O02 [AY990138.1]                                                                                                                                       |
| WT_UP_1468 | 98  | 129314 | Mouse cecum clone C13_B16 [AY991253.1]                                                                                                                                       |
| WT_UP_147  | 98  | 133024 | Mouse cecum clone C15_D13 [AY993700.1]                                                                                                                                       |
| WT_UP_1553 | 88  | 175080 | Obesity- gut microbiome increased capacity energy harvest cecal contents Mus musculus strain C57BL/6J; obob_recipient leptin genotype +/+ clone SWPT3_aaa04e12 [EF099535.1]  |
| WT_UP_1599 | 99  | 131769 | Mouse cecum clone C20_b14 [AY991738.1]                                                                                                                                       |
| WT_UP_1626 | 98  | 130326 | Mouse cecum clone M3_b04 [DQ015358.1]                                                                                                                                        |
| WT_UP_1669 | 95  | 167204 | Mouse cecum clone (clone) [DQ815411.1]                                                                                                                                       |
| WT_UP_1689 | 99  | 183958 | Obesity- gut microbiome increased capacity energy harvest cecal contents Mus musculus strain C57BL/6J; obob_recipient leptin genotype +/+ clone SWPT15_aaa02b08 [EF098390.1] |
| WT_UP_172  | 99  | 129321 | Mouse cecum clone C12_I01 [AY989949.1]                                                                                                                                       |
| WT_UP_1743 | 96  | 131630 | Mouse cecum clone C12_O02 [AY990138.1]                                                                                                                                       |
| WT_UP_1744 | 97  | 131630 | Mouse cecum clone C12_O02 [AY990138.1]                                                                                                                                       |
| WT_UP_175  | 96  | 175580 | Obesity- gut microbiome increased capacity energy harvest cecal contents Mus musculus strain C57BL/6J; lean_recipient leptin genotype +/+ clone SWPT13_aaa02g07 [EF096923.1] |
| WT_UP_1778 | 96  | 176860 | Obesity- gut microbiome increased capacity energy harvest cecal contents Mus musculus strain C57BL/6J; obob_recipient leptin genotype +/+ clone SWPT16_aaa03g05 [EF098708.1] |
| WT_UP_178  | 99  | 131350 | Mouse cecum clone M3_b05_2 [DQ015522.1]                                                                                                                                      |
| WT_UP_1828 | 99  | 199414 | Obesity- gut microbiome increased capacity energy harvest cecal contents Mus musculus strain C57BL/6J; lean_donor leptin genotype +/+ clone lean2_aaa01a12 [EF095968.1]      |
| WT_UP_1830 | 97  | 131630 | Mouse cecum clone C12_O02 [AY990138.1]                                                                                                                                       |
| WT_UP_1833 | 97  | 131630 | Mouse cecum clone C12_O02 [AY990138.1]                                                                                                                                       |
| WT_UP_1880 | 99  | 134346 | Mouse cecum clone M3_g10_1 [DQ015500.1]                                                                                                                                      |
| WT_UP_1884 | 94  | 178817 | Obesity- gut microbiome increased capacity energy harvest cecal contents Mus musculus strain C57BL/6J; obob_recipient leptin genotype +/+ clone SWPT15_aaa02g11 [EF098421.1] |
| WT_UP_1909 | 95  | 134135 | Mouse cecum clone C23_n15 [AY992662.1]                                                                                                                                       |
| WT_UP_195  | 100 | 129437 | Mouse cecum clone C21_I17 [AY993266.1]                                                                                                                                       |
| WT_UP_2064 | 98  | 129961 | Mouse cecum clone C21_e08 [AY993105.1]                                                                                                                                       |
| WT_UP_2083 | 98  | 131250 | Mouse cecum clone M1_1c10_1 [DQ014946.1]                                                                                                                                     |
| WT_UP_214  | 96  | 131795 | Mouse cecum clone C11_L131 [AY991639.1]                                                                                                                                      |
| WT_UP_226  | 99  | 129838 | Mouse cecum clone M2_h02_3 [DQ015248.1]                                                                                                                                      |
| WT_UP_2372 | 100 | 169953 | Mouse cecum clone (clone) [DQ815482.1]                                                                                                                                       |
| WT_UP_245  | 99  | 209962 | Pathogen-induced host response provides competitive advantage enteropathogens over intestinal microbiota mouse colon clone infected_7days-B9 [EF406637.1]                    |
| WT_UP_250  | 99  | 131413 | Mouse cecum clone M2_b05_1 [DQ015088.1]                                                                                                                                      |
| WT_UP_274  | 96  | 129838 | Mouse cecum clone M2_h02_3 [DQ015248.1]                                                                                                                                      |
| WT_UP_278  | 93  | 184664 | Obesity- gut microbiome increased capacity energy harvest cecal contents Mus musculus strain C57BL/6J; lean_recipient leptin genotype +/+ clone SWPT13_aaa04g11 [EF097057.1] |



|           |     |        |                                                                                                                                                                              |
|-----------|-----|--------|------------------------------------------------------------------------------------------------------------------------------------------------------------------------------|
| WT_UP_322 | 93  | 129747 | Mouse cecum clone C20_k07 [AY991906.1]                                                                                                                                       |
| WT_UP_337 | 98  | 129725 | Mouse cecum clone M3_f08 [DQ015402.1]                                                                                                                                        |
| WT_UP_357 | 98  | 206426 | Pathogen-induced host response provides competitive advantage enteropathogens over intestinal microbiota mouse colon clone infected_7days-F7 [EF406680.1]                    |
| WT_UP_366 | 99  | 135674 | Mouse cecum clone C21_e18 [AY993115.1]                                                                                                                                       |
| WT_UP_37  | 99  | 130079 | Mouse cecum clone M1_d10_1 [DQ014680.1]                                                                                                                                      |
| WT_UP_375 | 100 | 129725 | Mouse cecum clone M3_f08 [DQ015402.1]                                                                                                                                        |
| WT_UP_432 | 100 | 131150 | Mouse cecum clone C10_H21 [AY991407.1]                                                                                                                                       |
| WT_UP_447 | 98  | 129725 | Mouse cecum clone M3_f08 [DQ015402.1]                                                                                                                                        |
| WT_UP_46  | 99  | 130741 | Mouse cecum clone M1_e11 [DQ014606.1]                                                                                                                                        |
| WT_UP_462 | 99  | 129981 | Mouse cecum clone C20_e02 [AY991778.1]                                                                                                                                       |
| WT_UP_465 | 97  | 192906 | Obesity- gut microbiome increased capacity energy harvest cecal contents Mus musculus strain C57BL/6J; lean_recipient leptin genotype +/+ clone SWPT11_aaa04d01 [EF096768.1] |
| WT_UP_484 | 98  | 133024 | Mouse cecum clone C15_D13 [AY993700.1]                                                                                                                                       |
| WT_UP_487 | 99  | 130676 | Mouse cecum clone C12_C22 [AY990087.1]                                                                                                                                       |
| WT_UP_491 | 99  | 176121 | Obesity- gut microbiome increased capacity energy harvest cecal contents Mus musculus strain C57BL/6J; obob_donor leptin genotype ob/ob clone obob1_aaa03a09 [EF096232.1]    |
| WT_UP_496 | 99  | 180731 | Obesity- gut microbiome increased capacity energy harvest cecal contents Mus musculus strain C57BL/6J; lean_donor leptin genotype +/+ clone lean2_aaa01f09 [EF096000.1]      |
| WT_UP_498 | 99  | 130945 | Mouse cecum clone M3_f07_1 [DQ015569.1]                                                                                                                                      |
| WT_UP_504 | 99  | 130153 | Mouse cecum clone C20_h11 [AY991851.1]                                                                                                                                       |
| WT_UP_566 | 98  | 129570 | Mouse cecum clone M1_d09_2 [DQ014765.1]                                                                                                                                      |
| WT_UP_570 | 94  | 134208 | Mouse cecum clone C21_m13 [AY993284.1]                                                                                                                                       |
| WT_UP_572 | 99  | 213896 | Pathogen-induced host response provides competitive advantage enteropathogens over intestinal microbiota mouse colon clone infected_28days-D5 [EF406831.1]                   |
| WT_UP_596 | 98  | 129725 | Mouse cecum clone M3_f08 [DQ015402.1]                                                                                                                                        |
| WT_UP_661 | 99  | 133779 | Mouse cecum clone M3_d06_1 [DQ015463.1]                                                                                                                                      |
| WT_UP_664 | 97  | 129725 | Mouse cecum clone M3_f08 [DQ015402.1]                                                                                                                                        |
| WT_UP_701 | 97  | 190375 | Obesity- gut microbiome increased capacity energy harvest cecal contents Mus musculus strain C57BL/6J; obob_recipient leptin genotype +/+ clone SWPT4_aaa03e07 [EF099728.1]  |
| WT_UP_726 | 97  | 130543 | Mouse cecum clone C16_I16 [AY992309.1]                                                                                                                                       |
| WT_UP_727 | 95  | 166612 | Mouse cecum clone (clone) [DQ815739.1]                                                                                                                                       |
| WT_UP_76  | 99  | 131350 | Mouse cecum clone M3_b05_2 [DQ015522.1]                                                                                                                                      |
| WT_UP_837 | 98  | 174389 | Obesity- gut microbiome increased capacity energy harvest cecal contents Mus musculus strain C57BL/6J; obob_recipient leptin genotype +/+ clone SWPT16_aaa01c05 [EF098551.1] |
| WT_UP_880 | 99  | 129960 | Mouse cecum clone M1_1d06 [DQ014915.1]                                                                                                                                       |
| WT_UP_885 | 99  | 185341 | Obesity- gut microbiome increased capacity energy harvest cecal contents Mus musculus strain C57BL/6J; obob_recipient leptin genotype +/+ clone SWPT15_aaa02h05 [EF098426.1] |
| WT_UP_908 | 99  | 132507 | Mouse cecum clone M1_1c05_1 [DQ014991.1]                                                                                                                                     |
| WT_UP_932 | 95  | 129961 | Mouse cecum clone C21_e08 [AY993105.1]                                                                                                                                       |
| WT_UP_954 | 100 | 174526 | Obesity- gut microbiome increased capacity energy harvest cecal contents Mus musculus strain C57BL/6J; obob_recipient leptin genotype +/+ clone SWPT2_aaa03d01 [EF099169.1]  |
| WT_UP_973 | 99  | 129314 | Mouse cecum clone C13_B16 [AY991253.1]                                                                                                                                       |
| WT_UP_999 | 99  | 129725 | Mouse cecum clone M3_f08 [DQ015402.1]                                                                                                                                        |

Average 97.5
